# Supplementary material for: Profiling the Escherichia coli membrane protein interactome captured in Peptidisc libraries
Source: eLife. 2019 Jul 31;8:e46615. doi: 10.7554/eLife.46615 (PMC6697469; doi:10.7554/eLife.46615)
Supplement: Supplementary file 5. [file elife-46615-supp5.xlsx]

## Sheet: YEG DDM APMS
Gene names	Razor + unique peptides YEG-det-190329_G1_01_12842	SILAC ratio	Log(2) SILAC	total intensity	Log(2) Intensity
secY	11	313.61	8.29282775280053	38504000	25.198504992627
fepA	3	29.249	4.87031539583288	589120	19.1682020062373
rplA	5	13.047	3.70564620952314	2746700	21.3892679143402
rplI	5	11.89	3.57167680997093	1756400	20.7441900089013
rplO	4	10.028	3.32596199617185	1878200	20.8409192657797
rpmC	2	9.853	3.30056305717381	394840	18.5909086265372
rplT	5	9.3964	3.23210812945624	1990100	20.9244094955099
rplQ	4	8.699	3.12084956441415	897970	19.7763077216591
ompA	5	8.557	3.09710509058366	857850	19.7103658806992
ykgM	3	8.2118	3.03769849075364	1263500	20.2689942336069
rplK	4	8.0683	3.01226472803438	725300	19.4682183233442
rplL	4	7.6652	2.93832343509917	6226900	22.570082679973
rplX	8	7.208	2.84959901115145	2023200	20.948207511438
rpsM	6	7.1317	2.83424601625296	1819400	20.7950313275833
sra	3	6.7224	2.74897638924621	759830	19.5353171487941
rplF	3	6.3555	2.66800562942296	1435900	20.4535238487584
rplU	2	6.2635	2.64696905038256	533320	19.0246419058888
rpsE	6	6.2243	2.63791159729098	1392100	20.4088314186733
rpsT	2	6.1885	2.62958976407509	227920	17.7981680012112
rplD	4	5.9752	2.57898700333258	568240	19.1161408648704
cirA	3	5.8789	2.55554623788408	213630	17.7047547329423
rplC	8	5.5918	2.48331276125553	1742100	20.7323960091986
rpsG	6	5.5068	2.46121421258398	1007300	19.9420619885726
rplV	5	5.3993	2.43277237912983	1060200	20.0159050150475
skp	2	5.1145	2.35459320716919	1286400	20.2949078809537
rpsC	5	4.5322	2.18021152678986	1081500	20.0446022346241
rpsP	4	4.4035	2.13865066588866	284490	18.1180184162342
rplE	4	4.2898	2.10091038764691	745810	19.5084486156804
rpsA	8	4.2871	2.10000206955084	1334200	20.3475435157423
rpsF	5	4.2131	2.0748821593827	1645100	20.6497438524453
osmE	2	4.0482	2.01728056767068	2368500	21.1755422412435
rplM	6	4.0004	2.00014426229109	1449300	20.466924827928
rplY	5	3.9015	1.96402890000206	542860	19.0502206589346
ihfB	2	3.7774	1.91739356308998	199060	17.6028438230729
rpmA	3	3.751	1.90727526299938	859140	19.7125337173819
rpsR	2	3.6322	1.86084364400111	950970	19.8590403039202
rpsD	10	3.418	1.77315239701405	1192500	20.185557835555
rpsQ	3	3.069	1.6177686458044	331240	18.3375173752848
rpsN	2	3.0188	1.59397517932056	526390	19.005772556429
rpsS	3	2.9488	1.56012797608126	444550	18.761986167272
metQ	4	2.4192	1.27453004467162	337610	18.3649981117069
rpsB	10	2.3331	1.2222481446184	2225500	21.0856980701144
slp	3	2.2688	1.18192943769007	1525600	20.5409453180875
rpmD	2	2.2586	1.17542879082226	215180	17.7151844666357
dcrB	2	2.2559	1.17370311707108	189670	17.5331319809463
secA	6	2.2375	1.16188768237689	188800	17.5264992391366
fruA	3	2.2355	1.16059754588055	492380	18.9094126365703
rplB	9	2.2221	1.15192374303565	5097300	22.2813018344324
rpsL	3	2.0296	1.02119542451449	910390	19.7961251851683
damX	2	1.8847	0.914334898583108	155180	17.2435831056724
acrB	19	1.8275	0.869871406177713	10550000	23.330739663144
ydgA	6	1.8242	0.867263911076289	288630	18.1388617347713
ppiD	5	1.7653	0.819913379946224	377960	18.5278740346631
tsr	4	1.7023	0.767485308688175	447540	18.771657107032
rcsF	2	1.6532	0.725261268825091	202770	17.6294846945651
dacA	7	1.6266	0.701859519009419	383380	18.5484155515226
acrA	5	1.5886	0.667755908410372	352160	18.4258715247789
glnA	3	1.5833	0.662934639875537	163790	17.3214877521068
rpoA	3	1.5698	0.65058076460224	187480	17.5163771743664
atpA	6	1.4478	0.533862321387458	592670	19.1768695068932
atpF	3	1.3998	0.485220713155906	263520	18.0075529346137
cyoA	9	1.3693	0.45343856134876	4502400	22.1022628030113
dnaJ	7	1.3678	0.45185729447654	828610	19.6603337058852
argE	5	1.3655	0.449429314103199	1084200	20.0481994813605
gltX	3	1.3585	0.442014565559888	372620	18.5073455859854
yqjD	2	1.3417	0.4240621254159	3644900	21.7974478032226
ndh	7	1.337	0.418999465431266	1060500	20.0163131901926
serA	3	1.3254	0.406427824526982	284860	18.1198935272916
wbbK	2	1.2809	0.357157848719755	206390	17.6550135454891
fliC	4	1.2718	0.346871813944249	430360	18.7151844666357
degQ	2	1.2504	0.322389683450215	195200	17.5745935273376
ftsH	4	1.2471	0.318577153796079	485180	18.8881605556135
fruB	5	1.2191	0.28581647180462	654660	19.3203863067853
atpD	5	1.2037	0.267475871796492	459880	18.8108979312801
rpsJ	5	1.1689	0.225151511841273	2369900	21.176394753955
rpsO	3	1.1653	0.22070141650652	1052300	20.0051146302393
gapA	4	1.1358	0.183708816875412	262560	18.0022876184011
hns	2	1.1316	0.178364081846803	363480	18.4715164584039
sohB	1	1.0837	0.115965431586807	145160	17.1472844363667
rho	10	1.0306	0.0434844976035795	993740	19.9225089119622
gadC	3	1.0281	0.0399805976908813	547760	19.0631843919795
pepA	3	1.0055	0.00791308164326493	586780	19.162460173
cyoB	5	0.9922	-0.0112971376567712	3719300	21.826599690239
glnD	11	0.95925	-0.0600212350592938	377970	18.5279122047329
rne	21	0.91022	-0.135712808313389	3211800	21.6149506278109
oppA	2	0.8679	-0.204399270898694	228000	17.7986742988268
leuC	3	0.85328	-0.228908861753818	287280	18.132098032552
nadB	9	0.84201	-0.248090727552058	435760	18.7331742467278
adhE	5	0.81091	-0.302386291121502	255250	17.9615514355399
degP	7	0.8095	-0.304897014359521	895380	19.7721405677251
znuC	4	0.79766	-0.326154161521884	1277100	20.2844400652776
aceE	14	0.77668	-0.364607778757354	1408400	20.4256257016379
icd	3	0.77293	-0.371590331740754	275980	18.0742041945334
ycfP	3	0.74366	-0.427284920366422	2151400	21.0368443527399
znuA	7	0.74195	-0.430606127963885	10108000	23.2689942336069
pdxH	4	0.72707	-0.459833825940193	582660	19.1522947465388
sucB	5	0.71276	-0.488511719616869	357360	18.4470186341906
crp	7	0.70454	-0.505246477545587	4639400	22.145506807221
zinT	5	0.70358	-0.507213621615458	5347800	22.3505140810525
metE	9	0.70248	-0.509470943306905	675360	19.3652972088451
eno	3	0.64441	-0.633949212825393	370710	18.4999315071979
fes	3	0.64267	-0.637849966314592	294700	18.1688875348987
nuoC	6	0.64021	-0.643382883112062	255260	17.9616079552963
sdhA	5	0.62906	-0.668730466377112	481850	18.8782245795311
gatY	7	0.60302	-0.729722242973739	2205700	21.0728051508499
hchA	3	0.56532	-0.822860357047734	240370	17.8748973224327
glmS	15	0.56208	-0.83115261321444	6375800	22.6041749440206
rhlB	4	0.54918	-0.864649008415843	1802000	20.7811675804756
evgS	6	0.53943	-0.890492336666297	249900	17.9309913758614
crl	2	0.52643	-0.925686387694971	183610	17.48628510921
map	3	0.51153	-0.967109241853136	1315600	20.3272894826101
purB	3	0.50998	-0.97148742518871	224070	17.7735899784906
lpdA	7	0.494	-1.01741705307741	1209600	20.2060986139958
yrdA	4	0.48393	-1.04712971671903	319110	18.2836942937227
nudC	4	0.47367	-1.07804579350173	249650	17.9295473811048
tufB;tufA	13	0.45537	-1.13488884574238	4373500	22.0603568631549
can	4	0.45117	-1.14825695421216	1877200	20.840150934803
alaC	5	0.44634	-1.16378499137683	297510	18.1825786359933
ftsX	6	0.44388	-1.17175838859166	560450	19.0962261445778
clpB	5	0.43581	-1.19822879429199	289780	18.1445985010207
cueO	2	0.43292	-1.20782764329918	310480	18.2441408126728
rlmJ	5	0.4317	-1.211899002088	385590	18.5567081112291
ahpF	14	0.4225	-1.24297675349254	2360800	21.1708443952067
sucA	10	0.42144	-1.2466008441803	1048100	19.9993449413727
cfa	6	0.40378	-1.30835864190842	325070	18.3103908934355
argA	6	0.39236	-1.34975012454099	370910	18.5007096388966
pheA	7	0.38762	-1.36728508358633	789610	19.5907807353292
ygiN	3	0.38492	-1.37736946101791	792520	19.5960878179371
hisB	6	0.37906	-1.39950186957457	1022100	19.9631049225922
thrS	15	0.37855	-1.40144422667649	1834500	20.8069554739106
rapZ	3	0.37775	-1.40449633949726	228910	17.80442096326
folE	6	0.37201	-1.42658669195056	1204300	20.1997633921526
prfC	4	0.37155	-1.42837172558193	771140	19.5566332787667
katE	7	0.34428	-1.53834572094699	564940	19.1077381272762
trmD	4	0.33779	-1.5658014759368	315510	18.2673262061796
dacB	6	0.33027	-1.59828216618693	897360	19.7753273514667
hemY	4	0.32609	-1.61665789535762	2353100	21.16613120159
pyrB	7	0.32586	-1.61767582579146	867700	19.7268368036001
dnaK	7	0.31522	-1.66556902143368	805640	19.619775789322
bcp	3	0.31038	-1.6878924975119	581080	19.148377274311
pyrI	10	0.28019	-1.83552262808314	3780900	21.8502982617036
pdxB	5	0.27843	-1.84461342924867	145120	17.1468868354159
htpG	15	0.26726	-1.90368416497527	1296400	20.3060794950926
aroG	4	0.25048	-1.99723268129814	541110	19.0455623777736
chaB	2	0.24463	-2.03132675644617	206750	17.6575278038334
accC	7	0.24142	-2.05038289640168	741510	19.5001066234257
dps	9	0.23902	-2.06479675411394	5456900	22.3796501752803
yfbU	3	0.23094	-2.11441001790482	747660	19.5120228249927
murC	4	0.22316	-2.16384963838874	345130	18.3967803581497
mrp	2	0.21529	-2.21564678553299	190650	17.5405670055008
purU	3	0.1941	-2.36512797683579	172340	17.3948980634294
pliG	6	0.16149	-2.63048326369623	8162500	22.9605796559832
cbpA	6	0.10098	-3.30785851238571	408720	18.6407533152871
tonB	8	0.011283	-6.46970547756271	15501000	23.8858579538081

## Sheet: YEG peptidisc APMS
Gene names	Razor + unique peptides YEG-lib-1-190329_G2_01_12844	SILAC ratio	Log(2) SILAC	Total Intensity	Log(2) Intensity
secY	7	12.859	3.68470654850687	11240000	23.4221386997704
secG	2	7.7287	2.95022576715425	3856100	21.8787110346974
ompA	7	6.1255	2.61482761033224	12890000	23.6197489279111
yfgM	10	5.5446	2.47108338485376	7784200	22.8921173471849
ppiD	15	4.6733	2.22444165321384	7347000	22.8087238439472
bamB	8	3.0935	1.62924003395155	1333900	20.3472190837389
ghxP	1	3.0612	1.61409730477418	558390	19.0909135795238
yidC	7	2.9765	1.57361689436603	2890900	21.4630872742999
cycA	1	2.6471	1.40441269682765	557070	19.0874990987842
rodZ	3	2.6061	1.38189244335967	890970	19.7650173297756
aroP	1	2.5753	1.36474050348113	674250	19.3629240908977
damX	5	2.5532	1.35230655290634	889700	19.7629594268373
rcsF	3	2.5166	1.33147592612319	1816600	20.7928093545838
yajC	4	2.5116	1.32860671742742	2248500	21.1005314533311
fepA	8	2.3357	1.22385498470325	854250	19.7042988170914
bamC	7	2.1936	1.13330047622978	682160	19.3797506361698
yedD	5	2.1013	1.07128214850074	1163500	20.1500397800674
rpmC	3	2.0845	1.0597013721463	2531000	21.2712760767728
yibN	4	2.0336	1.02403593545551	1892900	20.8521667662534
rplI	10	2.0157	1.01128093610049	8410900	23.0038287522143
yncE	6	2.0082	1.00590295685824	701560	19.420206968162
ptsG	5	1.9955	0.996750278849185	4203700	22.0032282833541
pspA	4	1.9146	0.937043014451019	356280	18.4426519735952
cirA	15	1.9125	0.93545974780529	1753900	20.7421350630493
bamA	4	1.8858	0.915176677970458	566460	19.1116145596281
fruA	6	1.7882	0.838508102780656	2558200	21.2866976278083
rplF	8	1.7853	0.836166523635819	4185600	21.9970030152728
rplV	7	1.7785	0.830660974399763	2730400	21.3806808888736
ftsH	15	1.7774	0.829768393283535	2268500	21.1133072290128
rplM	7	1.7706	0.824238326603714	3283000	21.6465833192351
rplA	9	1.7694	0.823260228233444	4976700	22.2467579919917
proP	4	1.7268	0.788100997912005	1357000	20.3719892900809
rplC	8	1.7224	0.784420224617784	3353100	21.6770640788062
rpsS	4	1.7208	0.783079429873612	2347100	21.1624478796261
rplO	6	1.6397	0.713431883073091	4543600	22.1154044007739
rplX	5	1.639	0.712815854437372	1830400	20.8037275265531
pntA	9	1.6192	0.695281195144861	1148700	20.131570635346
rpsG	6	1.6105	0.687508660720728	2342600	21.1596792037294
rpsP	5	1.6056	0.683112521813168	1623200	20.6304093395314
rplQ	4	1.584	0.663572335417523	1156300	20.1410843204168
rplS	6	1.571	0.651683180632109	4034700	21.9440299752677
gcd	15	1.5642	0.645424988707263	4245800	22.0176049834775
rplT	4	1.5439	0.62657931078201	1731400	20.7235076339195
rpsM	7	1.512	0.596458139558986	3887200	21.890299906892
dacC	7	1.5093	0.593879595457209	1030500	19.9749130742013
secA	17	1.4468	0.532865503106325	1711000	20.7064083291515
acrA	4	1.4255	0.511468039275866	365360	18.4789591692657
rplL	6	1.4084	0.494057132313682	4743200	22.1774292711645
rplB	7	1.401	0.486456955768731	6171200	22.5571196204035
hflC	7	1.3806	0.465295389395797	1317200	20.3290429863701
glnA	7	1.3569	0.440314401803118	443110	18.7573053600231
skp	3	1.3564	0.439782689475982	999650	19.9310635376742
hflK	9	1.354	0.43722773891291	753380	19.5230182089647
infC	5	1.3412	0.423524388244335	1328600	20.3414753888534
rpsH	3	1.3333	0.415001431451972	725800	19.4692125312541
ybaY	3	1.3281	0.409363779269573	1543000	20.5573066312328
rplR	3	1.3181	0.398459827122383	2198000	21.0677599556113
ykgM	5	1.3005	0.379066399280904	3180100	21.6006407018891
hupA	4	1.2841	0.360757557511937	1468400	20.4858135888743
osmE	3	1.2784	0.354339313378527	1078700	20.0408622583471
pnp	10	1.265	0.339137384919585	1091000	20.0572196709857
pepA	4	1.2434	0.314290483987996	383040	18.5471355318309
accA	5	1.2415	0.312084261514754	501780	18.9366954432392
yedI	2	1.2391	0.309292623057521	387580	18.5641346008006
rpsF	7	1.2094	0.274291484102103	2500600	21.2538428694784
rpoC	5	1.2002	0.26327483497207	413990	18.6592363940342
obgE	5	1.1977	0.260266586997568	617270	19.2355421509379
rpsA	17	1.1899	0.250840333561645	6896200	22.717370184648
dacA	4	1.1864	0.246590502905181	273240	18.0598091717451
rpsC	12	1.1833	0.242815884026842	4243400	22.0167892486167
rplP	4	1.1628	0.217602976586788	1731600	20.7236742749871
ydgA	11	1.1627	0.217478900470531	1230000	20.2302268848887
engB	3	1.1586	0.212382570122357	451100	18.7830877604941
secD	15	1.1489	0.200253231593687	1184700	20.1760903429562
tsr	14	1.1395	0.18840092460321	3601200	21.7800462940942
atpF	9	1.139	0.187767747046025	4814000	22.1988047111366
manX	6	1.1127	0.154064673674717	970610	19.8885321984129
rho	12	1.1072	0.146915848087275	1659400	20.6622302605957
atpC	2	1.0992	0.136453909268651	775130	19.5640787649876
rpsD	8	1.0979	0.134746655368488	1317600	20.3294810295011
rne	20	1.0732	0.101918959711072	4888800	22.2210489554618
rseP	4	1.0662	0.092478087200385	333120	18.3456824481868
fruB	4	1.0561	0.0787464470766484	641080	19.2901448755892
rpsN	2	1.0521	0.0732718364245194	962440	19.8763370780921
rplY	3	1.0368	0.0521376233351753	1757000	20.7446827606705
rplD	5	1.0234	0.0333701384605922	1029800	19.9739327445722
degQ	9	1.0225	0.0321008431670241	1760400	20.7474718461693
yeeX	2	1.0102	0.0146409468817532	367160	18.4860493683057
tonB	10	0.059496	-4.0710635125163	9133000	23.1226574026117
thrA	26	0.14207	-2.81532615269635	4001200	21.9320013129281
rpmF	4	0.17034	-2.55351083999126	3005400	21.5191255867538
metE	19	0.19035	-2.39327352498719	3829300	21.8686492594308
znuA	10	0.19053	-2.39190991898691	7885300	22.9107342134051
gatZ	5	0.19846	-2.3330798362184	542690	19.0497687992157
uspA	2	0.2117	-2.23990682554186	837120	19.6750749203854
aroF	5	0.21213	-2.23697942974433	1340800	20.3546626234741
gatY	8	0.21375	-2.22600367488883	1865600	20.8312082629752
crp	6	0.21976	-2.18599927936096	5527800	22.3982739881929
cysC	4	0.2221	-2.17071870200247	466590	18.8317958621168
trpGD	8	0.22784	-2.13390704347041	986190	19.9115060983734
pliG	4	0.2365	-2.08008791132269	1109400	20.0813481999001
aroG	6	0.251	-1.99424073071132	1297200	20.3069694982305
glmS	19	0.25321	-1.98159371276912	10484000	23.3216859229905
metF	6	0.25786	-1.9553400994931	974720	19.8946283213747
minD	5	0.26171	-1.93395904373498	342390	18.3852810407755
can	6	0.27072	-1.88512662131686	1330700	20.3437539284809
purC	5	0.27328	-1.87154821481632	480930	18.875467397534
ahpF	9	0.27385	-1.86854221452091	1671300	20.6725392911525
cheZ	6	0.27588	-1.85788722299748	960540	19.8734861680778
dadA	9	0.27694	-1.85235464958301	2236200	21.0926177942247
argE	8	0.27987	-1.83717124595738	1603400	20.612702948671
oppF	9	0.28602	-1.80581206364598	993590	19.9222911280445
ffh	8	0.29903	-1.74163786571451	1111100	20.0835572357467
tufB;tufA	15	0.30284	-1.72337232156385	14036000	23.7426285170643
cheA	9	0.30377	-1.71894869703006	551730	19.07360290275
ftsA	4	0.30407	-1.71752460994329	911100	19.7972498836633
yegQ	4	0.31176	-1.68149225826777	316470	18.271709219264
mreB	8	0.32801	-1.60818829610958	798370	19.6066979846105
oppA	3	0.33284	-1.58709927098199	439960	18.7470128381302
yeaG	5	0.34119	-1.55135273182386	172860	17.3992445407684
hisB	11	0.36524	-1.45308332123684	1786600	20.7687852363772
pdxH	4	0.37026	-1.43338939446957	945440	19.8506263784616
glyA	4	0.37735	-1.40602482067944	641520	19.2911347178516
ubiE	4	0.38307	-1.38432004888528	534940	19.0290175593025
argD	6	0.3936	-1.34519787421021	1012400	19.9493479818854
trpE	10	0.39837	-1.32781908824658	393090	18.5845001372731
hemY	6	0.42092	-1.24838203397221	900260	19.7799821942567
yfcH	8	0.42448	-1.23623151420812	920130	19.8114781802866
ycfP	5	0.42763	-1.22556502729896	560070	19.0952476272171
pyrI	10	0.42998	-1.21765853872811	5488200	22.3879016262268
ftsE	3	0.43318	-1.20696145989796	587720	19.1647694682371
nusG	5	0.43496	-1.20104536163871	1062900	20.0195744406142
aceE	33	0.43531	-1.19988493259592	30594000	24.8667454080118
gadB	2	0.4361	-1.19726910446784	445900	18.7663606740886
oppD	4	0.44137	-1.17993952218442	515910	18.9767598852821
dld	14	0.44145	-1.1796780518879	1368500	20.384164004027
sra	4	0.4417	-1.1788612625093	2556500	21.285738595349
rsd	2	0.45169	-1.14659512069597	338720	18.369733648895
tig	6	0.45333	-1.14136645733631	848740	19.6949631458143
trmB	5	0.46506	-1.10451123647678	1240700	20.2427228847647
gltB	6	0.47892	-1.06214341020438	464170	18.8242937565982
icd	9	0.48104	-1.05577123124074	1376400	20.3924683665117
degP	8	0.49275	-1.0210722236186	2214500	21.0785495665474
folE	8	0.4949	-1.01479105268245	4482800	22.0959687043486
evgS	4	0.49875	-1.00361125355238	544040	19.0533532025303
serA	3	0.50193	-0.994441917353862	247240	17.9155526445934
pyrB	7	0.50298	-0.991427059616936	1511800	20.5278358635835
cyoA	8	0.50399	-0.988532986347756	5984500	22.5127992855567
eno	7	0.5062	-0.982220587438766	1471500	20.4888561116025
dps	11	0.51264	-0.963982042028102	3713300	21.8242704455264
znuC	7	0.51938	-0.94513763431031	1780500	20.7638510050252
fliC	12	0.52686	-0.924508442585749	5624200	22.423216467767
aceF	6	0.53208	-0.910284918848349	467090	18.8333410330306
argG	3	0.54014	-0.888594704040876	182200	17.4751634335768
nadB	12	0.55847	-0.840448311069892	373960	18.512524437363
cyoB	4	0.56433	-0.825389049042839	909640	19.7949361703257
narX	5	0.56564	-0.822043948995453	206020	17.6524248725261
cfa	6	0.60416	-0.726997425074971	486960	18.8934437453652
purB	14	0.6122	-0.707925050022458	3078200	21.5536555403127
cysA	12	0.61452	-0.702468129966762	451110	18.7831197418519
lpdA	16	0.61599	-0.699021164531329	5798800	22.4673229500528
gapA	6	0.6189	-0.692221772941809	1750500	20.7393356310906
arcB	3	0.64918	-0.623309541004682	236680	17.8525782746374
thrS	13	0.64981	-0.621910149251054	1686000	20.6851731056042
oppB	4	0.65277	-0.615353339425016	1075200	20.0361736125535
cydA	6	0.69289	-0.529301759914177	672150	19.3584237016484
dcrB	2	0.69432	-0.526327365786056	332960	18.3449893446227
rpoA	7	0.69972	-0.515150366292504	1160000	20.145693374677
sucA	19	0.70802	-0.498137981057501	5739700	22.4525439020748
wbbI	5	0.70921	-0.49571521622451	253800	17.9533325436158
ubiF	3	0.72511	-0.463728224702309	315300	18.2663656444581
atpD	14	0.74602	-0.422713786774084	6753700	22.6872466654411
adhE	23	0.74983	-0.415364547221613	6991100	22.7370880406173
rpoB	13	0.75038	-0.414306718906858	896270	19.7735738819237
clsA	7	0.75071	-0.413672394021391	771900	19.5580544322297
ndh	14	0.7653	-0.385902695225821	2912800	21.4739752152192
lldD	4	0.77931	-0.359730765960526	459690	18.8103017568471
nuoC	9	0.78828	-0.343219923505381	527060	19.0076076806546
gadC	5	0.79323	-0.334188853487048	2162600	21.0443354147526
ygaM	3	0.80584	-0.31143467563891	2352100	21.1655179672694
atpA	13	0.81922	-0.287677157932502	4308500	22.0387542532042
rplE	11	0.82143	-0.283790456967919	4986500	22.249596119493
rplJ	6	0.84047	-0.25073177051653	316900	18.273668134157
atpG	4	0.8429	-0.24656661207312	580340	19.1465388446736
rpsJ	8	0.87651	-0.190157544269793	14996000	23.8380743949502
sucB	8	0.88576	-0.175012246800087	1262300	20.267623393335
slp	6	0.89479	-0.160378961681016	3009300	21.5209965068156
yadG	3	0.89599	-0.158445464201489	268240	18.0331648626811
rpsT	3	0.89818	-0.154923497265606	678300	19.3715639672474
rsuA	8	0.90128	-0.149952718197264	3789600	21.8536141463561
rpsK	2	0.91613	-0.126375761796726	906170	19.7894222036818
acrB	20	0.92678	-0.109701183844048	8729400	23.057451065473
rpsE	7	0.94198	-0.086231665842432	2647500	21.3361992535418
hemX	6	0.94935	-0.0749880264256774	441490	18.7520212348161
copA	8	0.95925	-0.0600212350592938	1284300	20.2925508106928
rhlB	10	0.96927	-0.0450294959110316	1779300	20.7628783469462
rpsO	5	0.97364	-0.0385396554550555	19833000	24.2413995847317
rpsB	13	0.97826	-0.0317101421235	8236000	22.9735123992943
tar	14	0.9807	-0.0281162170610272	995770	19.9254530257886
guaB	3	0.99965	-0.000505031650006267	834570	19.6706735359091

## Sheet: BamA DDM APMS
Gene names	Razor + unique peptides BAN-det-190329_G6_01_12849	SILAC ratio	Log(2) SILAC	Total intensity	Log(2) Intensity
bamD	9	80.159	6.3247926056156	1376600	20.3926779843894
rcsF	3	80.117	6.32403649499262	1054300	20.0078540121331
bamA	37	42.315	5.403097261532	27215000	24.6978987002745
bamC	10	31.627	4.98308480944049	1271900	20.2785538160664
cyoB	6	3.2896	1.71791216964443	2327900	21.1505976548029
cyoA	9	3.058	1.61258840669872	2022000	20.9473515665651
rpmB	2	2.915	1.54349588342577	104830	16.6776921174346
acrB	20	2.5855	1.3704433048213	5027600	22.2614384416418
fruA	4	2.4919	1.31724617414088	222860	17.7657781723258
osmE	2	2.1647	1.11416709954703	289720	18.1442997548507
aceE	11	1.6974	0.76332658256796	552430	19.0754321424687
ndh	7	1.6681	0.738205778698426	451490	18.7843345084105
yqjD	3	1.5094	0.593975179320556	4352300	22.0533465729702
rplS	5	1.4235	0.509442493080179	428920	18.7103490630335
argE	2	1.3872	0.472175803672386	301700	18.2027551709214
rplF	2	1.359	0.442545456105304	316800	18.2732128098543
skp	2	1.3376	0.419646752531433	195160	17.5742978628134
rpsB	3	1.2357	0.305328532039964	160160	17.2891543537234
glnD	3	1.1506	0.202386375334789	98049	16.581215296021
fliC	5	1.1027	0.141040345433593	154950	17.2414432293609
pyrB	7	1.0874	0.120882733248652	1616000	20.6239957674139
rsuA	3	1.0834	0.115565995921603	168710	17.364185963906
adhE	3	1.031	0.0440443327060212	115900	16.8225210407812
rplQ	2	1.0146	0.02091106558169	96295	16.5551732693889
tolB	12	0.17228	-2.53717286619495	8326800	22.9893307418532
dacB	2	0.26553	-1.9130532266784	186870	17.5116754526949
pliG	7	0.30661	-1.70552334402524	2333200	21.1538785485885
dps	7	0.34115	-1.55152187858852	371840	18.5043224482919
mrp	2	0.3596	-1.475535074035	78572	16.2617276633059
pheA	4	0.3749	-1.41542226926136	193340	17.560780621203
rhlB	6	0.44049	-1.18281882741969	387440	18.563613382489
ftsX	5	0.45393	-1.1394582564882	185790	17.503313326326
metE	7	0.46319	-1.11032398816242	165300	17.334727199067
folE	4	0.48435	-1.04587815321431	403430	18.6219588445601
znuA	9	0.49355	-1.01873184789961	4046800	21.9483501195576
tufB;tufA	9	0.54067	-0.887179786649363	856230	19.7076388590174
uspG	7	0.54839	-0.866725831359478	982680	19.9063621681412
ftsA	3	0.56705	-0.818452143544044	147270	17.1681040469746
gatY	6	0.57502	-0.798315959005963	823470	19.6513565662347
thrS	8	0.66435	-0.589984596942977	244090	17.8970536657217
ahpF	12	0.66656	-0.585193350396165	625220	19.2540044035091
lpdA	3	0.6742	-0.568751467565239	180250	17.4596397339029
can	4	0.69105	-0.533137996224082	300870	18.1987807359471
arnA	3	0.69173	-0.531719068112762	104060	16.6670560868641
hemY	4	0.69779	-0.519135172410656	461350	18.8155021311218
hisB	4	0.70037	-0.513810806915678	148230	17.177477936056
rpsJ	4	0.71196	-0.490131906255664	849030	19.6954560059378
rplB	6	0.75955	-0.396783156654101	260530	17.9910899826766
crp	5	0.76954	-0.377931776388705	1665600	20.6676105430741
trmB	3	0.76993	-0.377200809136361	251980	17.9429497040117
znuC	5	0.77946	-0.359453105681201	343620	18.3904544837336
rne	8	0.78001	-0.358435474940772	332910	18.3447726814537
degP	2	0.83199	-0.265361906709829	107050	16.7079252701602
eno	2	0.84281	-0.246720662952338	111300	16.7640940671167
glmS	17	0.86904	-0.202505512239478	2023200	20.948207511438
nadB	8	0.92001	-0.120278552335101	303660	18.2120973546172
atpA	2	0.93623	-0.095065100230802	96071	16.5518133842198
htpG	5	0.94874	-0.0759153207112381	185140	17.498257101505
rpsA	2	0.95002	-0.0739702092363066	124700	16.9281019396044
pdxH	5	0.96047	-0.0581875424511689	186530	17.5090481551617
pyrI	6	0.96743	-0.0477708184431048	405400	18.6289865632416
dadA	5	0.98864	-0.0164828163338098	151170	17.2058123365783

## Sheet: BamA peptidisc APMS
Gene names	Razor + unique peptides BAN-lib-1-190329_G5_01_12848	SILAC ratio	Log(2) SILAC	Total Intensity	Log(2) Intensity
bamA	48	26.725	4.74011804283313	55961000	25.7379184073102
bamD	9	12.445	3.63749432520631	762350	19.5400939752199
bamC	11	11.668	3.54448538623609	4295500	22.0343946414414
bamB	9	11.58	3.53356334821451	4648000	22.1481786380666
rcsF	3	7.3209	2.87202101814349	2611100	21.3162262804186
bamE	1	6.282	2.65122394298988	215560	17.7177299662771
ompA	5	5.0091	2.32455141336543	3534700	21.7531563439406
rodZ	5	3.1049	1.63454680408913	711670	19.4408488957868
fruA	6	2.872	1.52205574916096	1917500	20.8707951470524
slyB	3	2.707	1.43669488755288	947410	19.8536293742158
yidC	8	2.5574	1.35467782850445	1359100	20.3742201800994
ftsH	13	2.3336	1.22255729134873	2065600	20.9781294750819
yajC	4	2.2951	1.19855701479858	891130	19.7652763850555
pntA	6	2.0766	1.05422334733715	999010	19.930139593774
fepA	5	1.9171	0.938925593000493	113740	16.7953801838396
rplB	13	1.8739	0.906043966148932	6656300	22.6662890266552
fruB	5	1.8558	0.892041239260971	732670	19.4828040185469
oppB	3	1.8414	0.880803051638192	819070	19.6436272283023
tsr	8	1.79	0.839959587489532	3127000	21.5763477885871
rpoB	5	1.7551	0.811553233033541	176730	17.4311874332711
rplD	6	1.7201	0.782492440107821	241730	17.8830370049066
tar	15	1.7087	0.772899122289309	987210	19.9129974828599
secY	2	1.7021	0.767315799224828	198860	17.6013935866813
rpsN	3	1.6742	0.743471882591393	524640	19.0009682812804
yibN	4	1.6219	0.697684871372977	779780	19.5727076270297
atpF	7	1.5755	0.655809754355453	1433500	20.4511104739026
rplQ	4	1.5598	0.641361056327364	558410	19.0909652519823
rpsC	11	1.5456	0.628166999286324	2943900	21.4892972352998
skp	3	1.5405	0.623398682377264	496300	18.9208529290718
obgE	5	1.525	0.608809242675524	240750	17.8771762725056
lon	2	1.5133	0.597698019021249	138000	17.0743087414403
rplT	3	1.5006	0.585539463352677	678320	19.3716065051738
hemX	6	1.453	0.539034702970754	220760	17.7521192650791
rplA	9	1.4441	0.530170648394639	4930200	22.2332147419224
cirA	6	1.4422	0.528271247103276	326540	18.3169002020952
pnp	7	1.4399	0.525968621033089	560870	19.0973068921709
rplE	8	1.4116	0.497331335230275	3644400	21.7972498836633
rplP	3	1.4017	0.487177608389148	958060	19.869756484252
hflC	5	1.3851	0.469990138221073	255150	17.9609861161593
rplU	2	1.3747	0.459116814466672	1574300	20.5862790576101
rpmC	3	1.3535	0.436694887552877	1197200	20.1912327532728
copA	10	1.3506	0.433600462625863	322520	18.2990291016585
rlmJ	5	1.3413	0.423631951714348	110900	16.7588998399364
yfgM	3	1.3381	0.420185936691721	330030	18.3322376470413
rpsB	13	1.3323	0.41391897713882	5166300	22.3006999905474
rplO	5	1.3295	0.410883777195581	1529900	20.545005925367
rplS	4	1.328	0.409255146684838	1023100	19.9645157334233
hflK	5	1.3228	0.403594950641665	286760	18.1294842717463
cyoB	3	1.3187	0.399116393444799	758350	19.5325043211492
rpoC	5	1.3068	0.386038359888614	209280	17.6750749203854
degQ	7	1.2976	0.375845724667824	731910	19.4813067315029
rplM	8	1.2829	0.35940871904277	2157800	21.0411297212772
rplN	3	1.2716	0.346644921588527	841160	19.6820207211141
dacC	2	1.2661	0.340391357220078	140320	17.0983611273321
yedD	3	1.2576	0.330673122709157	367040	18.4855777709032
ppiD	4	1.2368	0.306612224375398	560840	19.0972297227577
gcd	10	1.2349	0.30439421966803	1132900	20.1115890907905
aroP	2	1.2301	0.298775603076542	345090	18.3966131424744
rplI	12	1.2261	0.294076649192365	3768800	21.8456738064426
rplL	3	1.2186	0.28522464546786	1090100	20.0560290555985
infC	4	1.2024	0.265916914366915	620700	19.2435366203559
rcsD	4	1.1836	0.243181601644472	165430	17.3358613590463
secD	6	1.1754	0.233151803439294	157890	17.2685602751013
sucB	8	1.1714	0.228233799560068	502880	18.9398546516861
rplR	5	1.1686	0.224781194395589	1106300	20.0773112296018
ndh	12	1.1606	0.214870834003905	2286500	21.1247094884691
rseP	2	1.1436	0.193582525081649	95831	16.5482048028571
ygdI	2	1.1362	0.184216808092241	763370	19.5420229650227
rpsP	3	1.1289	0.174917695239588	1171400	20.1598023688842
nuoC	7	1.1188	0.161952158926742	411380	18.6501121307153
guaB	1	1.1181	0.161049224900557	192670	17.5557724263475
secA	9	1.1165	0.158983251160387	312160	18.2519261574964
rplV	4	1.1159	0.158207747625736	1349700	20.3642073420749
rplX	7	1.1092	0.149519521490029	1868300	20.8332947019743
wbbI	7	1.1035	0.142086629617527	544130	19.0535918464076
hupA	4	1.1032	0.141694361964531	650180	19.3104796528204
rplF	7	1.1008	0.138552375152649	2155900	21.0398588305083
osmE	2	1.0858	0.118758388979835	606080	19.2091487103558
pspA	2	1.0831	0.115166449634935	287890	18.1351581514904
icd	8	1.0823	0.11410045158818	1102200	20.0719546016072
rpsM	7	1.0761	0.105812151129231	1050700	20.002919373453
rpsG	7	1.0721	0.100439479280312	1368300	20.3839531453536
cyoA	7	1.072	0.100304905795685	7990000	22.9297640724774
acrB	21	1.0658	0.0919367382105852	5408800	22.3668771215868
hemB	5	1.0542	0.0761485971800829	195130	17.5740760746491
atpD	22	1.0382	0.0540843928423792	5101200	22.2824052341351
ybaY	3	1.0353	0.0500488796072226	816260	19.6386692356589
nuoG	5	1.0318	0.0451633516032245	215830	17.7195358853383
rho	9	1.0278	0.0395595572557058	499490	18.9300962693818
arcB	5	1.0243	0.0346383179990089	285820	18.1247473457036
adhE	24	1.0216	0.0308304301532745	4873000	22.2163787918544
pyrB	8	1.0177	0.025312343046069	1516500	20.5323140672863
clsA	5	1.0071	0.0102069428692571	333580	18.3476732681181
rpsF	7	1.0001	0.000144262291094538	1315200	20.3268507734564
rne	19	0.99478	-0.00755059234949992	2291800	21.1280497183065
atpG	5	0.98971	-0.0149222392425239	351290	18.42230298309
ffh	8	0.98521	-0.0214968234479802	571240	19.123737479331
cysA	11	0.97712	-0.0333923445935603	712710	19.442955641331
rpsS	4	0.97693	-0.0336729024693903	933730	19.8326459109092
aceF	4	0.9686	-0.046027091947825	291960	18.155411200547
thrS	9	0.96577	-0.0502484455447818	621470	19.2453252246915
ptsG	5	0.96445	-0.0522216483411886	2041500	20.9611981368872
sdhA	9	0.95604	-0.0648571141349022	345350	18.3976996980864
gapA	7	0.95463	-0.0669864199563361	1305800	20.3165025158994
atpA	12	0.95021	-0.0736817051513459	2723200	21.3768715114607
serA	3	0.94548	-0.0808811541168659	287750	18.1344564027943
rpsA	16	0.94404	-0.0830801054495602	3199600	21.6094601262847
oppD	5	0.94381	-0.0834316374685725	252480	17.9458095849008
rpsH	2	0.93248	-0.100855312372299	536050	19.0320080486045
slp	3	0.92605	-0.110838004204624	1007100	19.9417755121934
lysS	2	0.92104	-0.118664282166282	88376	16.4313670140755
gadB	5	0.91842	-0.122774035640915	240630	17.876456992899
pyrI	5	0.91341	-0.130665510479355	3145200	21.5847203288243
oppF	10	0.91154	-0.133622129203911	1070800	20.0302576134155
rplY	4	0.87983	-0.184703300512099	1016800	19.9556045047797
rsuA	10	0.87147	-0.19847709387109	1903100	20.8599199405597
rhlB	8	0.86419	-0.210579558051222	1041300	19.9899543403245
hemY	4	0.84763	-0.238493445255026	566610	19.111996538248
ygaM	2	0.84455	-0.243745257276094	1217000	20.2148977373758
recA	4	0.82558	-0.276520073557292	340910	18.379031393477
degP	8	0.82213	-0.282561555571335	1459200	20.4767462039395
ydgA	4	0.80298	-0.316564040220924	220780	17.7522499617355
ftsY	2	0.8027	-0.317067197282784	141850	17.1140066250491
rpsE	5	0.79835	-0.324906726179708	913600	19.8012031251376
sucA	24	0.79518	-0.330646623530014	3640100	21.7955466536829
mreB	8	0.78795	-0.343824009673579	880430	19.7478487792686
crl	3	0.78421	-0.350688056120817	222690	17.7646772491125
lpdA	12	0.76803	-0.380765429766557	2540500	21.2766810334598
ykgM	2	0.7317	-0.450675836032109	650430	19.3110342752893
gyrB	2	0.72944	-0.455138780572047	155240	17.2441408126728
cheA	7	0.72876	-0.456484319865583	218910	17.7399783340305
purB	11	0.70912	-0.495898308387623	1546400	20.560482111986
thrA	25	0.70521	-0.503875162418547	2188900	21.0617746157574
evgS	4	0.70473	-0.504857464709964	371870	18.504438840034
gadC	3	0.70228	-0.509881745166479	1097700	20.066052390835
rpsJ	9	0.69683	-0.521121358551694	7340300	22.807407596925
minD	5	0.69211	-0.53092674511398	225590	17.7833435915079
dps	6	0.68451	-0.546856476932271	1881300	20.8432984947412
tig	7	0.68359	-0.548796802402175	632350	19.2703637725508
aceE	28	0.68218	-0.551775635925168	14150000	23.7542987172687
eno	7	0.67752	-0.561664560265963	1024300	19.9662068873232
uspA	2	0.67148	-0.574583665198188	606800	19.2108615600218
rpsT	3	0.66954	-0.57875784654047	191210	17.5447984505439
fliC	11	0.65368	-0.613343537749438	3812900	21.8624572636728
cydA	5	0.63369	-0.658150845750173	198280	17.5971796383577
nusG	6	0.6333	-0.659039015481137	935290	19.8350542369692
ftsA	2	0.60496	-0.725088340449577	440460	18.7486514824091
folE	5	0.57069	-0.809220811488922	1827300	20.8012820795796
trpA	2	0.56936	-0.812586953807007	90202	16.460871801479
cfa	5	0.5613	-0.833156035587509	298050	18.1851948477456
pdxH	9	0.55812	-0.841352749191045	746010	19.5088354438633
oppA	2	0.54645	-0.871838599085511	332260	18.3419530952575
rsd	3	0.53823	-0.893705288366474	109700	16.7432040001779
metF	4	0.52172	-0.938652355123858	181230	17.4674622668451
trmB	4	0.51901	-0.946165758979692	795610	19.6017018839163
znuC	11	0.4706	-1.08742677432515	1922700	20.8747022450149
nadB	14	0.45405	-1.13907691900078	696870	19.4105300231448
slyD	3	0.44952	-1.15354278947261	9049100	23.1093428819505
can	5	0.43815	-1.19050323599911	811560	19.6303382340314
glmS	21	0.43077	-1.21501031473201	8014100	22.9341090811648
hisB	12	0.42939	-1.21963950201019	1227000	20.226703818325
gatY	5	0.40414	-1.30707294468817	502540	18.9388789075541
tufB;tufA	14	0.3592	-1.4771407448083	6223900	22.5693874499145
dld	6	0.33795	-1.56511828059287	370020	18.4972437265865
ahpF	4	0.3362	-1.57260837031328	622600	19.2479460512439
metE	14	0.33572	-1.57466960896498	965660	19.8811557932526
aroF	5	0.32746	-1.61060940602678	284550	18.1183226539074
yqjD	2	0.32492	-1.62184354539427	16543000	23.9797175488211
dadA	10	0.31217	-1.67959619604315	3706200	21.8215093058493
sra	5	0.31202	-1.68028958831249	1557900	20.5711712005837
crp	9	0.31045	-1.68756716319078	4450600	22.0855684129703
argE	7	0.30598	-1.70849073884459	398300	18.6034959541389
tolB	5	0.26267	-1.92867665773033	203620	17.6355197474601
znuA	6	0.20843	-2.26236515059003	3127200	21.576440059064
rpmF	3	0.13139	-2.92807261754833	1368000	20.383636799548

## Sheet: MetNI DDM APMS
Protein.Names	Razor + unique peptides 07-Ni-det_A8_01_11904	SILAC ratio	Log(2) SILAC ratio	total intensity	log(2) intensity
Methionine import ATP-binding protein MetN (EC 3.6.3.-)	25	211.86	7.72696741670603	640000000	29.2534966642115
D-methionine transport system permease protein MetI	3	18.388	4.20069266615472	724060	19.4657497271539
D-methionine-binding lipoprotein MetQ	17	12.538	3.64823532977363	51932000	25.6301204516346
Uncharacterized lipoprotein YdcL	5	5.2223	2.38468533702274	2113700	21.0113391971208
Outer membrane protein Slp	3	5.111	2.35360559133812	3426700	21.7083884619524
D-alanyl-D-alanine carboxypeptidase DacC (DD-carboxypeptidase) (DD-peptidase) (EC 3.4.16.4) (Penicillin-binding protein 6) (PBP-6)	12	4.2171	2.0762512326186	3169300	21.5957327983177
D-alanyl-D-alanine carboxypeptidase DacA (DD-carboxypeptidase) (DD-peptidase) (EC 3.4.16.4) (Beta-lactamase) (EC 3.5.2.6) (Penicillin-binding protein 5) (PBP-5)	9	4.0681	2.02435514323939	2335600	21.1553617855672
Universal stress protein A	2	3.9469	1.98071996708212	1003200	19.9361778225768
Phosphatidylserine decarboxylase proenzyme (EC 4.1.1.65) [Cleaved into: Phosphatidylserine decarboxylase alpha chain; Phosphatidylserine decarboxylase beta chain]	3	3.718	1.89452677025739	1270000	20.2763970663216
Osmotically-inducible putative lipoprotein OsmE (Activator of ntr-like gene protein)	4	3.6688	1.87530826003134	12719000	23.6004819109538
60 kDa chaperonin (GroEL protein) (Protein Cpn60)	13	3.5383	1.82305637424759	9132600	23.1225942151975
Lipoprotein 28	7	3.4788	1.7985897392331	1200300	20.1949636038415
Biopolymer transport protein ExbD	2	3.4707	1.79522666703425	371100	18.5014484754723
Lipoprotein NlpI	3	2.9667	1.56885904532345	264910	18.0151427789904
Outer membrane protein C (Outer membrane protein 1B) (Porin OmpC)	7	2.8001	1.48547835107307	698720	19.4143549106676
Penicillin-binding protein activator LpoB (PBP activator LpoB) (Lipoprotein activator of PBP from the outer membrane B)	3	2.7733	1.47160368745638	850640	19.6981891714471
Putative glycosyltransferase WbbK	7	2.7656	1.46759250871295	7096400	22.7586559010815
	3	2.7036	1.43488171940713	481650	18.8776256402217
Uncharacterized lipoprotein YgdI	3	2.693	1.42921422983959	517020	18.9798605641506
3-ketoacyl-CoA thiolase FadI (EC 2.3.1.16) (ACSs) (Acetyl-CoA acyltransferase) (Acyl-CoA ligase) (Beta-ketothiolase) (Fatty acid oxidation complex subunit beta)	3	2.6289	1.39445926472204	558630	19.0915335269108
Cytoskeleton protein RodZ	5	2.5822	1.3686007465141	3643800	21.797012344346
Septum site-determining protein MinD (Cell division inhibitor MinD)	3	2.5743	1.3641801900358	389150	18.56996683156
50S ribosomal protein L22 (Large ribosomal subunit protein uL22)	7	2.4665	1.30246528733241	6940200	22.7265458077546
Flagellar brake protein YcgR (Cyclic di-GMP binding protein YcgR)	3	2.3963	1.26080853476227	801080	19.6115867992682
Uncharacterized protein YiaF	3	2.344	1.22897256976016	804200	19.6171948105751
30S ribosomal protein S2 (Small ribosomal subunit protein uS2)	10	2.2427	1.16523664786119	6501400	22.6323189883229
30S ribosomal protein S16 (Small ribosomal subunit protein bS16)	3	2.2191	1.14997468161938	1301700	20.3119655613126
Quinone-dependent D-lactate dehydrogenase (EC 1.1.5.12) ((R)-lactate:quinone 2-oxidoreductase) (D-lactate dehydrogenase) (D-LDH) (Respiratory D-lactate dehydrogenase)	10	1.9669	0.97592361080838	2073700	20.9837757653954
Multidrug efflux pump subunit AcrA (AcrAB-TolC multidrug efflux pump subunit AcrA) (Acridine resistance protein A)	5	1.9663	0.975483451634553	941170	19.8440958095113
Tail-specific protease (EC 3.4.21.102) (C-terminal-processing peptidase) (PRC protein) (Protease Re)	3	1.9131	0.935912287031362	169500	17.3709257477984
50S ribosomal protein L29 (Large ribosomal subunit protein uL29)	3	1.8718	0.904426292601508	5845200	22.4788209583363
Uncharacterized protein YraP	5	1.8652	0.899330334790445	758540	19.5328657343818
30S ribosomal protein S15 (Small ribosomal subunit protein uS15)	7	1.8424	0.881586316243396	19180000	24.1930993845676
Phosphate import ATP-binding protein PstB (EC 7.3.2.1) (ABC phosphate transporter) (Phosphate-transporting ATPase)	1	1.7837	0.834872989189161	138120	17.0755627137408
PTS system fructose-specific EIIB'BC component (EIIB'BC-Fru) [Includes: PTS system fructose-specific EIIB component (EC 2.7.1.202) (EIII-Fru) (Fructose-specific phosphotransferase enzyme IIB component); PTS system fructose-specific EIIC component (Fructose permease IIC component)]	7	1.7813	0.83293051029928	7873800	22.9086286368284
Outer membrane protein assembly factor BamE	1	1.732	0.792438930064638	841330	19.6823122630047
5,10-methylenetetrahydrofolate reductase (EC 1.5.1.20)	6	1.6908	0.757706017481343	833390	19.6686322634178
	4	1.6837	0.7516351033279	1415800	20.4331860498672
Universal stress protein E	2	1.675	0.74416109557041	586820	19.1625585162203
	4	1.5799	0.659833245699991	413830	18.6586787094907
Spermidine/putrescine import ATP-binding protein PotA (EC 3.6.3.31)	1	1.5682	0.64910956494293	138080	17.0751448440663
Zinc resistance-associated protein	3	1.5544	0.636357806035895	352270	18.4263220917786
Methyl-accepting chemotaxis protein II (MCP-II) (Aspartate chemoreceptor protein)	9	1.5364	0.619553868981616	1931600	20.8813649379474
Protein-export membrane protein SecG (P12) (Preprotein translocase band 1 subunit)	3	1.536	0.619178216059069	1580700	20.5921321548694
Zinc/cadmium/lead-transporting P-type ATPase (EC 3.6.3.-) (EC 3.6.3.3) (EC 3.6.3.5) (Pb(II)/Cd(II)/Zn(II)-translocating ATPase) (Zn(2+)/Cd(2+)/Pb(2+) export ATPase)	5	1.5218	0.605778767535464	1011100	19.9474942593144
PTS system mannose-specific EIIAB component (EC 2.7.1.191) (EIIAB-Man) (EIII-Man) [Includes: Mannose-specific phosphotransferase enzyme IIA component (PTS system mannose-specific EIIA component); Mannose-specific phosphotransferase enzyme IIB component (PTS system mannose-specific EIIB component)]	7	1.5045	0.58928410667125	1882200	20.8439885043395
Intermembrane transport protein PqiB (Paraquat-inducible protein B)	2	1.4977	0.582748670621304	192690	17.5559221767152
GTP-binding protein TypA/BipA (Tyrosine phosphorylated protein A)	11	1.4842	0.56968551215184	884510	19.7545189281144
Peptidoglycan-associated lipoprotein (PAL) (Tol-Pal system lipoprotein Pal)	5	1.4655	0.551392968027455	839870	19.6798065108167
Chaperone protein DnaK (HSP70) (Heat shock 70 kDa protein) (Heat shock protein 70)	7	1.4587	0.54468320538365	1330100	20.3431032842842
Universal stress protein UP12 (Universal stress protein G)	8	1.4579	0.543891765994186	4453200	22.0864109761934
50S ribosomal protein L11 (Large ribosomal subunit protein uL11)	5	1.4548	0.540820830906168	851920	19.7003584342046
Alcohol dehydrogenase, propanol-preferring (EC 1.1.1.1)	4	1.4499	0.535953400599432	1101100	20.070514067248
Probable L,D-transpeptidase YnhG (EC 2.-.-.-)	3	1.4387	0.524765790386697	607350	19.2121686181723
Oligopeptide transport ATP-binding protein OppD	2	1.4365	0.522557992870437	565730	19.1097541518771
Sec translocon accessory complex subunit YajC	2	1.4363	0.522357116367621	1083100	20.0467350189591
Acetyl-coenzyme A carboxylase carboxyl transferase subunit alpha (ACCase subunit alpha) (Acetyl-CoA carboxylase carboxyltransferase subunit alpha) (EC 2.1.3.15)	5	1.4129	0.498659360498882	525530	19.0034135975507
Ribosome-binding ATPase YchF	2	1.3711	0.455333796677223	239260	17.8682196986211
50S ribosomal protein L10 (50S ribosomal protein L8) (Large ribosomal subunit protein uL10)	5	1.369	0.453122446595813	1135200	20.1145150638353
Uncharacterized protein YeaG	6	1.3534	0.436588293660118	705210	19.4276934069056
Bifunctional aspartokinase/homoserine dehydrogenase 1 (Aspartokinase I/homoserine dehydrogenase I) (AKI-HDI) [Includes: Aspartokinase (EC 2.7.2.4); Homoserine dehydrogenase (EC 1.1.1.3)]	16	1.3518	0.434881719407135	7651700	22.8673488804106
Flagellar motor switch protein FliM	2	1.3368	0.418783638511739	413340	18.6569694583024
Enolase (EC 4.2.1.11) (2-phospho-D-glycerate hydro-lyase) (2-phosphoglycerate dehydratase)	8	1.3314	0.412944073368718	2426200	21.2102670509925
6-phosphogluconate dehydrogenase, decarboxylating (EC 1.1.1.44)	3	1.3281	0.409363779269573	410540	18.6471632688887
Protein YdgA	6	1.3183	0.398678715765026	1293800	20.3031831871888
30S ribosomal protein S5 (Small ribosomal subunit protein uS5)	8	1.3004	0.378955461140907	6794800	22.6959996562617
Outer membrane lipoprotein RcsF	2	1.3001	0.378622595527227	745360	19.5075778728569
	4	1.2851	0.361880627038438	2085300	20.9918235200819
D-amino acid dehydrogenase (EC 1.4.99.-) (D-alanine dehydrogenase)	7	1.2644	0.338452940355049	3785400	21.8520143259488
30S ribosomal protein S18 (Small ribosomal subunit protein bS18)	4	1.2589	0.332163687954531	1863500	20.8295833883909
Uncharacterized protein YncE	4	1.25	0.321928094887362	1439600	20.4572365766995
Pyruvate dehydrogenase E1 component (PDH E1 component) (EC 1.2.4.1)	29	1.2435	0.31440650755482	19596000	24.2240558609449
Tol-Pal system protein TolB	3	1.2278	0.296075574952888	286240	18.1268657669393
50S ribosomal protein L6 (Large ribosomal subunit protein uL6)	6	1.2276	0.295840550917036	11326000	23.4331350991497
T-protein [Includes: Chorismate mutase (CM) (EC 5.4.99.5); Prephenate dehydrogenase (PDH) (EC 1.3.1.12)]	4	1.2245	0.292192773901891	378710	18.5307339911435
30S ribosomal protein S10 (Small ribosomal subunit protein uS10)	7	1.2225	0.289834465177509	15820000	23.9152462640222
ABC transporter ATP-binding protein ModF (Photorepair protein PhrA)	4	1.2208	0.287826867285081	586620	19.1620667330682
30S ribosomal protein S3 (Small ribosomal subunit protein uS3)	10	1.2193	0.286053134377475	5510400	22.3937256171716
NAD(P) transhydrogenase subunit beta (EC 7.1.1.1) (Nicotinamide nucleotide transhydrogenase subunit beta) (Pyridine nucleotide transhydrogenase subunit beta)	3	1.2182	0.284751009534226	1225300	20.2247035883675
UPF0227 protein YcfP	3	1.2136	0.279292990697584	5728300	22.449675620093
Chaperone protein DnaJ (HSP40) (Heat shock protein J)	12	1.2133	0.278936314679231	5057100	22.2698788761812
Regulator of sigma-E protease RseP (EC 3.4.24.-) (S2P endopeptidase) (Site-2 protease RseP) (S2P protease RseP) (Site-2-type intramembrane protease)	2	1.2102	0.275245489784668	518420	18.9837618511166
30S ribosomal protein S7 (Small ribosomal subunit protein uS7)	5	1.2061	0.270349528733103	2698400	21.3636727927929
Multiphosphoryl transfer protein (MTP) (Diphosphoryl transfer protein) (DTP) (Phosphotransferase FPr protein) (Pseudo-HPr) [Includes: Phosphocarrier protein HPr (Protein H); PTS system fructose-specific EIIA component (EIIA-Fru) (EIII-Fru) (Fructose-specific phosphotransferase enzyme IIA component)]	6	1.1964	0.258699815569903	4015600	21.9371841367311
Cell division protein FtsZ	6	1.1803	0.23915359984437	711610	19.4407272588601
Uncharacterized protein YbjS	6	1.1798	0.238542314279151	976940	19.8979104344191
Outer membrane protein assembly factor BamC	4	1.1762	0.234133395612483	920660	19.8123089414194
UTP--glucose-1-phosphate uridylyltransferase (EC 2.7.7.9) (Alpha-D-glucosyl-1-phosphate uridylyltransferase) (UDP-glucose pyrophosphorylase) (UDPGP) (Uridine diphosphoglucose pyrophosphorylase)	2	1.174	0.231432408447965	363910	18.4732221704424
Thiol peroxidase (Tpx) (EC 1.11.1.15) (Peroxiredoxin tpx) (Prx) (Scavengase p20) (Thioredoxin peroxidase)	2	1.1661	0.221691513510904	1168900	20.1567200811654
Catalase HPII (EC 1.11.1.6) (Hydroxyperoxidase II)	17	1.1631	0.217975140922887	2719000	21.3746447206868
Uncharacterized protein YbhP	7	1.1615	0.215989154146721	501850	18.9368966900195
Probable ABC transporter periplasmic-binding protein SapA	5	1.1569	0.210264166313091	279890	18.0945004171957
Histidine biosynthesis bifunctional protein HisB [Includes: Histidinol-phosphatase (EC 3.1.3.15); Imidazoleglycerol-phosphate dehydratase (IGPD) (EC 4.2.1.19)]	6	1.1562	0.209390977467428	611310	19.2215446417889
Nitrate/nitrite sensor protein NarX (EC 2.7.13.3)	6	1.1543	0.207018225945622	371450	18.5028085005257
Outer membrane protein assembly factor BamB	4	1.1535	0.206018004020896	1204600	20.2001227333577
3-deoxy-D-manno-octulosonic acid transferase (Kdo transferase) (EC 2.4.99.12) (EC 2.4.99.13) (Bifunctional Kdo transferase) (Kdo-lipid IV(A) 3-deoxy-D-manno-octulosonic acid transferase) (Lipid IV(A) 3-deoxy-D-manno-octulosonic acid transferase)	5	1.1478	0.198871279517819	267560	18.0295029248143
Protein translocase subunit SecA	8	1.147	0.197865391353738	567130	19.1133199483312
ATP synthase subunit b (ATP synthase F(0) sector subunit b) (ATPase subunit I) (F-type ATPase subunit b) (F-ATPase subunit b)	10	1.1469	0.197739606006356	1925300	20.8766518332047
NAD(P) transhydrogenase subunit alpha (EC 7.1.1.1) (Nicotinamide nucleotide transhydrogenase subunit alpha) (Pyridine nucleotide transhydrogenase subunit alpha)	3	1.1468	0.197613809691074	374750	18.51556895261
Cytochrome bo(3) ubiquinol oxidase subunit 2 (Cytochrome b562-o complex subunit II) (Cytochrome o ubiquinol oxidase subunit 2) (Cytochrome o subunit 2) (Oxidase bo(3) subunit 2) (Ubiquinol oxidase chain B) (Ubiquinol oxidase polypeptide II) (Ubiquinol oxidase subunit 2)	6	1.1455	0.195977458642588	10210000	23.2834795304273
Preprotein translocase subunit SecY	2	1.1404	0.189539944388503	1065400	20.0229637553359
Translation initiation factor IF-2	3	1.129	0.175045486110914	766680	19.548265019903
	5	1.1274	0.172999472591762	333400	18.3468945787611
Dihydromonapterin reductase (H(2)-MPt reductase) (EC 1.5.1.-) (Dihydrofolate reductase) (DHFR) (EC 1.5.1.3)	4	1.1248	0.169668499523086	505190	18.9464665563707
Citrate synthase (EC 2.3.3.16)	9	1.1246	0.169411951991355	3728300	21.8300865213493
Phosphotransferase RcsD (EC 2.7.2.-) (Phosphotransfer intermediate RcsD)	4	1.1204	0.164013888525057	274160	18.0646585714065
Uncharacterized protein YgiM	2	1.1192	0.162467867615304	244360	17.8986486199676
Uncharacterized protein YibQ	3	1.1166	0.159112461230858	247370	17.9163110213332
Methyl-accepting chemotaxis protein I (MCP-I) (Serine chemoreceptor protein)	6	1.1161	0.158466295124796	1387300	20.4038483697557
Ribosomal small subunit pseudouridine synthase A (EC 5.4.99.19) (16S pseudouridylate 516 synthase) (16S rRNA pseudouridine(516) synthase) (rRNA pseudouridylate synthase A) (rRNA-uridine isomerase A)	12	1.116	0.158337027167101	1867100	20.8323677682544
50S ribosomal protein L32 (Large ribosomal subunit protein bL32)	5	1.1115	0.152507948364903	22875000	24.4472684076082
	7	1.1085	0.14860877020522	4302800	22.0368443527399
ATP synthase subunit alpha (EC 7.1.2.2) (ATP synthase F1 sector subunit alpha) (F-ATPase subunit alpha)	12	1.1081	0.148088082645336	5799400	22.4674722175297
Modulator of FtsH protease HflC	5	1.106	0.14535138557262	432960	18.7238742188639
Glutamine synthetase (GS) (EC 6.3.1.2) (Glutamate--ammonia ligase) (Glutamine synthetase I beta) (GSI beta)	3	1.1028	0.141171172460741	999810	19.9312944312225
Elongation factor G (EF-G)	5	1.1027	0.141040345433593	886870	19.7583631199998
NADP-specific glutamate dehydrogenase (NADP-GDH) (EC 1.4.1.4)	5	1.1006	0.138290233779912	1706300	20.702439891515
ATP synthase epsilon chain (ATP synthase F1 sector epsilon subunit) (F-ATPase epsilon subunit)	2	1.0967	0.133168933486044	868780	19.728631365985
L-aspartate oxidase (LASPO) (EC 1.4.3.16) (Quinolinate synthase B)	8	1.0953	0.131326074606591	876340	19.7411311857553
Uncharacterized protein YgaM	1	1.0864	0.119555384695282	1377500	20.3936208881206
Peptidyl-prolyl cis-trans isomerase D (PPIase D) (EC 5.2.1.8) (Rotamase D)	8	1.0849	0.117562069256979	2129000	21.0217445191144
50S ribosomal protein L21 (Large ribosomal subunit protein bL21)	2	1.0792	0.109962253398818	464510	18.8253501298071
D-3-phosphoglycerate dehydrogenase (PGDH) (EC 1.1.1.95) (2-oxoglutarate reductase) (EC 1.1.1.399)	7	1.0696	0.0970713705439036	1484200	20.501254081476
	5	1.0641	0.0896337361068956	1425700	20.4432390068946
UPF0070 protein YfgM	3	1.0622	0.0870554345433757	884870	19.7551059927606
50S ribosomal protein L1 (Large ribosomal subunit protein uL1)	6	1.0603	0.0844725169369015	2253000	21.1034158828975
Bifunctional protein PutA [Includes: Proline dehydrogenase (EC 1.5.5.2) (Proline oxidase); Delta-1-pyrroline-5-carboxylate dehydrogenase (P5C dehydrogenase) (EC 1.2.1.88) (L-glutamate gamma-semialdehyde dehydrogenase)]	4	1.0597	0.0836558970806325	212600	17.6977820713058
Formate acetyltransferase 1 (EC 2.3.1.54) (Pyruvate formate-lyase 1)	9	1.0548	0.0769694763151108	1439600	20.4572365766995
NADPH-dependent curcumin reductase (EC 1.3.1.n3) (NADPH-dependent curcumin/dihydrocurcumin reductase)	4	1.0496	0.0698396250686344	660930	19.3341379564563
50S ribosomal protein L7/L12 (L8) (Large ribosomal subunit protein bL12)	3	1.0465	0.0655723115936221	1867300	20.8325222985717
Metalloprotease LoiP (EC 3.4.24.-)	4	1.0419	0.0592168165537986	215900	17.7200037177972
Protein HemY	9	1.041	0.05797006863733	5005500	22.2550827565656
1-deoxy-D-xylulose-5-phosphate synthase (EC 2.2.1.7) (1-deoxyxylulose-5-phosphate synthase) (DXP synthase) (DXPS)	5	1.0407	0.057554246458089	349100	18.4132808313275
50S ribosomal protein L9 (Large ribosomal subunit protein bL9)	10	1.0406	0.057415612427243	8741200	23.059399917152
50S ribosomal protein L13 (Large ribosomal subunit protein uL13)	12	1.0395	0.055889758196283	4981200	22.2480619070995
ATP synthase subunit beta (EC 7.1.2.2) (ATP synthase F1 sector subunit beta) (F-ATPase subunit beta)	15	1.0324	0.0460020465445205	4278800	22.0287748152985
ATP synthase gamma chain (ATP synthase F1 sector gamma subunit) (F-ATPase gamma subunit)	3	1.0271	0.0385766514523232	422040	18.6870202152338
Acetylornithine deacetylase (AO) (Acetylornithinase) (EC 3.5.1.16) (N-acetylornithinase) (NAO)	7	1.0252	0.0359053837421279	3189100	21.6047179059367
30S ribosomal protein S13 (Small ribosomal subunit protein uS13)	5	1.0218	0.0311128408502493	1593200	20.6034959541389
UPF0304 protein YfbU	6	1.0215	0.0306892040711404	1609600	20.6182707795803
50S ribosomal protein L17 (Large ribosomal subunit protein bL17)	3	1.0212	0.0302654428576696	1213300	20.2105048840034
Aspartate carbamoyltransferase catalytic subunit (EC 2.1.3.2) (Aspartate transcarbamylase) (ATCase)	16	1.0212	0.0302654428576696	10414000	23.3120209760523
Alanine--tRNA ligase (EC 6.1.1.7) (Alanyl-tRNA synthetase) (AlaRS)	7	1.0205	0.0292761823706321	766890	19.5486601319103
Glutathione import ATP-binding protein GsiA (EC 3.6.3.-)	6	1.0194	0.0277202583559274	289350	18.142456118545
50S ribosomal protein L15 (Large ribosomal subunit protein uL15)	5	1.0129	0.0184917490398792	2499800	21.2533812439914
30S ribosomal protein S11 (Small ribosomal subunit protein uS11)	4	1.0079	0.0113525072299052	4596900	22.1322298517344
30S ribosomal protein S1 (Bacteriophage Q beta RNA-directed RNA polymerase subunit I) (Small ribosomal subunit protein bS1)	13	1.0033	0.0047530553998195	6607000	22.6555639140394
Outer membrane protein F (Outer membrane protein 1A) (Outer membrane protein B) (Outer membrane protein IA) (Porin OmpF)	4	1.0029	0.00417776078910997	397650	18.6011396453631
tRNA (guanine-N(7)-)-methyltransferase (EC 2.1.1.33) (tRNA (guanine(46)-N(7))-methyltransferase) (tRNA(m7G46)-methyltransferase)	5	0.99985	-0.000216420488075745	4298000	22.0352340520899
Aspartate carbamoyltransferase regulatory chain	6	0.99959	-0.000591626258436883	7387900	22.8167329079672
Membrane protein insertase YidC (Foldase YidC) (Inner membrane protein YidC) (Membrane integrase YidC) (Oxa1Ec)	5	0.99604	-0.00572441419754482	1729900	20.722257211999
50S ribosomal protein L19 (Large ribosomal subunit protein bL19)	6	0.98827	-0.0170228481727521	3452200	21.7190846174592
FKBP-type peptidyl-prolyl cis-trans isomerase SlyD (PPIase) (EC 5.2.1.8) (Histidine-rich protein) (Metallochaperone SlyD) (Rotamase) (Sensitivity to lysis protein D) (WHP)	4	0.98351	-0.023988373469409	412780	18.6550135454891
DNA-binding protein HU-beta (HU-1) (NS1)	2	0.97666	-0.0340716838549626	1083500	20.0472677227558
Uncharacterized protein YbiB	4	0.97484	-0.0367626454083047	675900	19.3664502887313
30S ribosomal protein S4 (Small ribosomal subunit protein uS4)	5	0.97397	-0.0380507594563191	1547700	20.5616944216486
NADH-quinone oxidoreductase subunit G (EC 1.6.5.11) (NADH dehydrogenase I subunit G) (NDH-1 subunit G) (NUO7)	13	0.97308	-0.0393696764598047	1806800	20.7850053882122
Sulfite reductase [NADPH] hemoprotein beta-component (SiR-HP) (SiRHP) (EC 1.8.1.2)	4	0.96811	-0.0467571140834255	245000	17.9024222236647
UPF0047 protein YjbQ	5	0.96452	-0.0521169410073197	1270000	20.2763970663216
Dihydrolipoyl dehydrogenase (EC 1.8.1.4) (Dihydrolipoamide dehydrogenase) (E3 component of pyruvate and 2-oxoglutarate dehydrogenases complexes) (Glycine cleavage system L protein)	18	0.96191	-0.0560261786755949	15747000	23.908573667594
UDP-N-acetylglucosamine--N-acetylmuramyl-(pentapeptide) pyrophosphoryl-undecaprenol N-acetylglucosamine transferase (EC 2.4.1.227) (Undecaprenyl-PP-MurNAc-pentapeptide-UDPGlcNAc GlcNAc transferase)	4	0.96173	-0.0562961721339531	772770	19.5596795622811
50S ribosomal protein L3 (Large ribosomal subunit protein uL3)	5	0.95808	-0.061781968378395	6034200	22.5247310838775
Alkyl hydroperoxide reductase C (EC 1.11.1.15) (Alkyl hydroperoxide reductase protein C22) (Peroxiredoxin) (SCRP-23) (Sulfate starvation-induced protein 8) (SSI8) (Thioredoxin peroxidase)	3	0.95696	-0.0634694721694615	534010	19.0265072328577
Trigger factor (TF) (EC 5.2.1.8) (PPIase)	7	0.95257	-0.0701029813447361	2174700	21.0523849641412
Proline/betaine transporter (Proline porter II) (PPII)	2	0.95235	-0.0704362162421666	277330	18.0812441618932
Arginine transport ATP-binding protein ArtP (EC 3.6.3.-)	6	0.93709	-0.0937404810281821	4509400	22.1045040572151
DNA protection during starvation protein (EC 1.16.-.-)	9	0.93473	-0.0973783971746084	3830500	21.8691012905708
Glucosamine-6-phosphate deaminase (EC 3.5.99.6) (GlcN6P deaminase) (GNPDA) (Glucosamine-6-phosphate isomerase)	3	0.93154	-0.102310375572686	378960	18.5316860514688
DNA-directed RNA polymerase subunit beta (RNAP subunit beta) (EC 2.7.7.6) (RNA polymerase subunit beta) (Transcriptase subunit beta)	7	0.92944	-0.105566359916235	475530	18.8591768344206
Argininosuccinate synthase (EC 6.3.4.5) (Citrulline--aspartate ligase)	7	0.92693	-0.109467701523074	556820	19.0868515056353
Dihydrolipoyllysine-residue acetyltransferase component of pyruvate dehydrogenase complex (EC 2.3.1.12) (Dihydrolipoamide acetyltransferase component of pyruvate dehydrogenase complex) (E2)	9	0.92469	-0.112958308092556	1654700	20.6581382469341
Glutamate-pyruvate aminotransferase AlaC (EC 2.6.1.2)	3	0.91448	-0.128976476817513	971540	19.8899138697468
Aldehyde-alcohol dehydrogenase [Includes: Alcohol dehydrogenase (ADH) (EC 1.1.1.1); Acetaldehyde dehydrogenase [acetylating] (ACDH) (EC 1.2.1.10); Pyruvate-formate-lyase deactivase (PFL deactivase)]	18	0.91218	-0.132609556150951	7439900	22.8268517994648
Aerobic respiration control protein ArcA (Dye resistance protein)	3	0.91068	-0.134983894333569	1502600	20.5190295767021
	4	0.90996	-0.136124966136442	166750	17.3473272358467
1-deoxyxylulose-5-phosphate synthase YajO (EC 1.1.-.-)	4	0.90716	-0.140571066902074	254130	17.955207169767
Pyridoxal phosphate phosphatase YbhA (PLP phosphatase) (EC 3.1.3.74)	3	0.90698	-0.14085735694387	293490	18.1629518220781
Isocitrate lyase (ICL) (EC 4.1.3.1) (Isocitrase) (Isocitratase)	5	0.90396	-0.145669159722999	771960	19.5581665689552
	2	0.90255	-0.147921237398439	752470	19.5212745390813
50S ribosomal protein L25 (Large ribosomal subunit protein bL25)	6	0.90248	-0.148033134323048	1897500	20.8556684549649
Polyribonucleotide nucleotidyltransferase (EC 2.7.7.8) (Polynucleotide phosphorylase) (PNPase)	7	0.90192	-0.1489286222956	939450	19.8414568541007
Chaperone protein ClpB (Heat shock protein F84.1)	20	0.89371	-0.16212132772356	1953200	20.8974082524122
Cysteine synthase A (CSase A) (EC 2.5.1.47) (O-acetylserine (thiol)-lyase A) (OAS-TL A) (O-acetylserine sulfhydrylase A) (S-carboxymethylcysteine synthase) (EC 4.5.1.5) (Sulfate starvation-induced protein 5) (SSI5)	5	0.89153	-0.165644749507067	1281500	20.2894020479537
Spermidine N(1)-acetyltransferase (SAT) (EC 2.3.1.57) (Spermidine/spermine N(1)-acetyltransferase) (SSAT)	4	0.8871	-0.172831350707969	881780	19.7500592294263
Potassium binding protein Kbp (K(+) binding protein Kbp)	2	0.88444	-0.177163820415427	97113	16.5673768140215
50S ribosomal protein L24 (Large ribosomal subunit protein uL24)	9	0.88255	-0.180250079723211	5978000	22.5112314663402
Chain length determinant protein (Polysaccharide antigen chain regulator)	4	0.88247	-0.180380860794644	560100	19.0953249027221
50S ribosomal protein L2 (Large ribosomal subunit protein uL2)	12	0.88186	-0.18137845649387	10509000	23.3251220581853
Glutamine transport ATP-binding protein GlnQ	3	0.87915	-0.185818756829597	323520	18.3034953767904
50S ribosomal protein L5 (Large ribosomal subunit protein uL5)	10	0.87812	-0.187509989323508	13870000	23.7254644518731
Quinoprotein glucose dehydrogenase (EC 1.1.5.2) (Glucose dehydrogenase [pyrroloquinoline-quinone])	3	0.8764	-0.190338610559227	498860	18.9282754690685
DNA-binding protein HU-alpha (HU-2) (NS2)	5	0.87049	-0.200100370282985	1669200	20.6707253950381
Flagellin	16	0.86788	-0.204432516933121	25017000	24.5764054583267
	4	0.86632	-0.207028070930172	696400	19.4095566774258
ATP-dependent protease ATPase subunit HslU (Heat shock protein HslU) (Unfoldase HslU)	4	0.86356	-0.211631675447885	415760	18.6653914385553
2-octaprenyl-3-methyl-6-methoxy-1,4-benzoquinol hydroxylase (EC 1.14.13.-)	2	0.8615	-0.215077298437139	228220	17.8000657018061
50S ribosomal protein L16 (Large ribosomal subunit protein uL16)	4	0.85876	-0.219673101112188	1105900	20.0767895064098
	10	0.85711	-0.222447725706356	6130000	22.5474556432402
50S ribosomal protein L28 (Large ribosomal subunit protein bL28)	3	0.85593	-0.224435280483249	432130	18.721105865857
Threonine synthase (TS) (EC 4.2.3.1)	5	0.8554	-0.225328887673116	1270500	20.2769649447154
Zinc import ATP-binding protein ZnuC (EC 3.6.3.-)	3	0.85388	-0.227894759900242	679090	19.3732432623814
Nicotinate phosphoribosyltransferase (NAPRTase) (EC 6.3.4.21)	2	0.85161	-0.231735204202716	136710	17.0607592508318
Multidrug efflux pump subunit AcrB (AcrAB-TolC multidrug efflux pump subunit AcrB) (Acridine resistance protein B);Multidrug export protein AcrF (Acriflavine resistance protein F) (Protein EnvD)	23	0.84869	-0.236690416413311	18859000	24.1687498432315
RNA-binding protein Hfq (HF-1) (Host factor-I protein) (HF-I)	5	0.84487	-0.243198723650819	3279800	21.6451764122756
DNA-directed RNA polymerase subunit beta' (RNAP subunit beta') (EC 2.7.7.6) (RNA polymerase subunit beta') (Transcriptase subunit beta')	14	0.84275	-0.246823372677877	1355000	20.3698614209033
D-erythrose-4-phosphate dehydrogenase (E4PDH) (EC 1.2.1.72)	2	0.84144	-0.249067692956118	491610	18.9071547367781
Cell division protein DamX	3	0.84144	-0.249067692956118	487270	18.8943618765617
Bifunctional chorismate mutase/prephenate dehydratase (Chorismate mutase-prephenate dehydratase) (P-protein) [Includes: Chorismate mutase (CM) (EC 5.4.99.5); Prephenate dehydratase (PDT) (EC 4.2.1.51)]	6	0.83481	-0.260480212568819	1728900	20.7214229948826
Triosephosphate isomerase (TIM) (TPI) (EC 5.3.1.1) (Triose-phosphate isomerase)	8	0.83031	-0.26827802112227	3066600	21.5482085664961
D-tagatose-1,6-bisphosphate aldolase subunit GatY (TBPA) (TagBP aldolase) (EC 4.1.2.40) (D-tagatose-bisphosphate aldolase class II) (Tagatose-bisphosphate aldolase)	5	0.82861	-0.271234863438993	954180	19.8639019216025
GTPase Der (Double era-like domain protein) (GTP-binding protein EngA)	5	0.8273	-0.27351751273495	289920	18.1452953349336
Succinylornithine transaminase (SOAT) (EC 2.6.1.81) (Carbon starvation protein C) (Succinylornithine aminotransferase)	6	0.82289	-0.281228503925658	1186900	20.1787669579
NADH dehydrogenase (EC 1.6.99.3)	9	0.8219	-0.282965222002689	3622000	21.7883551156123
Succinate dehydrogenase flavoprotein subunit (EC 1.3.5.1)	10	0.82129	-0.28403636291198	7839400	22.9023118091048
Alkyl hydroperoxide reductase subunit F (EC 1.8.1.-) (Alkyl hydroperoxide reductase F52A protein)	8	0.81844	-0.289051438573155	2216200	21.0796566519695
Glyceraldehyde-3-phosphate dehydrogenase A (GAPDH-A) (EC 1.2.1.12) (NAD-dependent glyceraldehyde-3-phosphate dehydrogenase)	7	0.81732	-0.29102705687694	1790200	20.7716893427857
Asparagine synthetase B [glutamine-hydrolyzing] (AS-B) (EC 6.3.5.4)	4	0.80957	-0.304772265395085	387970	18.5655855739509
Acetylornithine/succinyldiaminopimelate aminotransferase (ACOAT) (DapATase) (Succinyldiaminopimelate transferase) (EC 2.6.1.11) (EC 2.6.1.17)	3	0.8069	-0.309538205081281	365630	18.4800249230483
NADH-quinone oxidoreductase subunit F (EC 1.6.5.11) (NADH dehydrogenase I subunit F) (NDH-1 subunit F) (NUO6)	5	0.80643	-0.310378785357356	1162500	20.1487992855448
Protein translocase subunit SecD (Sec translocon accessory complex subunit SecD)	11	0.80389	-0.314929990636876	617920	19.237060543838
Osmotically-inducible protein Y	4	0.80189	-0.318523747656875	954570	19.8644914708612
FhuE receptor (Outer-membrane receptor for Fe(III)-coprogen, Fe(III)-ferrioxamine B and Fe(III)-rhodotrulic acid)	3	0.79778	-0.325937138750444	228170	17.7997495916707
N-acetylglucosamine repressor	3	0.79301	-0.334589036197144	658710	19.329283926551
50S ribosomal protein L18 (Large ribosomal subunit protein uL18)	5	0.78949	-0.341007102445647	6693300	22.6742862480249
DNA repair protein RadA (EC 3.6.4.-) (Branch migration protein RadA) (DNA repair protein Sms)	4	0.78827	-0.34323822543099	192950	17.557867518316
Sulfate/thiosulfate import ATP-binding protein CysA (EC 3.6.3.25) (Sulfate-transporting ATPase)	8	0.78768	-0.344318450201943	198840	17.60124848283
DNA gyrase subunit B (EC 5.99.1.3) (Type IIA topoisomerase subunit GyrB)	10	0.77749	-0.363103975326678	1253800	20.2578758042104
UDP-N-acetylmuramate--L-alanyl-gamma-D-glutamyl-meso-2,6-diaminoheptandioate ligase (EC 6.3.2.45) (Murein peptide ligase) (UDP-N-acetylmuramate:L-alanyl-gamma-D-glutamyl-meso-diaminopimelate ligase)	3	0.7773	-0.363456578648199	1349800	20.364314228168
Hydroxycarboxylate dehydrogenase B (EC 1.1.1.-) (2-oxoglutarate reductase) (Hydroxyphenylpyruvate reductase) (EC 1.1.1.237) (Phenylpyruvate reductase)	3	0.77657	-0.364812119919128	564730	19.1072017476926
Peptide chain release factor RF3 (RF-3)	3	0.77388	-0.369818219508262	963330	19.877670569296
Outer membrane protein X	2	0.77362	-0.370303002337549	475050	18.8577198425241
Exopolyphosphatase (ExopolyPase) (EC 3.6.1.11) (Metaphosphatase)	4	0.76868	-0.379544962882755	490300	18.9033052360604
Glutamine--fructose-6-phosphate aminotransferase [isomerizing] (EC 2.6.1.16) (D-fructose-6-phosphate amidotransferase) (GFAT) (Glucosamine-6-phosphate synthase) (Hexosephosphate aminotransferase) (L-glutamine--D-fructose-6-phosphate amidotransferase)	22	0.76709	-0.382532240840517	14799000	23.8189963573777
Cold shock-like protein CspC (CSP-C)	2	0.76537	-0.385770741698369	1165600	20.1526413518392
Translation initiation factor IF-1	2	0.75814	-0.399463810269672	661150	19.3346180982207
Uncharacterized protein YqjD	3	0.75763	-0.400434636316656	8190300	22.9654848661948
ATP-dependent zinc metalloprotease FtsH (EC 3.4.24.-) (Cell division protease FtsH)	13	0.75621	-0.403141167467771	4236900	22.0145776477058
Phosphoenolpyruvate-protein phosphotransferase (EC 2.7.3.9) (Phosphotransferase system, enzyme I)	5	0.74601	-0.422733125460852	634870	19.2761016811941
Phosphoenolpyruvate carboxylase (PEPC) (PEPCase) (EC 4.1.1.31)	7	0.74259	-0.429362207445245	638360	19.2840107287389
Inosine-5'-monophosphate dehydrogenase (IMP dehydrogenase) (IMPD) (IMPDH) (EC 1.1.1.205)	5	0.73813	-0.438053167709289	1384700	20.4011420146285
Uncharacterized protease YegQ (EC 3.4.-.-)	5	0.73139	-0.451287193459702	714810	19.4472002918737
Malate dehydrogenase (EC 1.1.1.37)	2	0.72793	-0.45812837181009	156150	17.2525730437953
3-hydroxyacyl-[acyl-carrier-protein] dehydratase FabZ (EC 4.2.1.59) ((3R)-hydroxymyristoyl-[acyl-carrier-protein] dehydratase) ((3R)-hydroxymyristoyl-ACP dehydrase) (17 kDa actomyosin component) (Beta-hydroxyacyl-ACP dehydratase)	2	0.72465	-0.464643741396216	189900	17.5348803799242
Protein HemX (ORF X)	4	0.72218	-0.469569627938324	369470	18.4950977004907
Pyridoxine 4-dehydrogenase (EC 1.1.1.65)	1	0.71689	-0.480176326907339	466650	18.8319813700303
Methionine--tRNA ligase (EC 6.1.1.10) (Methionyl-tRNA synthetase) (MetRS)	2	0.71279	-0.48845099799892	188540	17.5245111076372
Glycerol-3-phosphate acyltransferase (GPAT) (EC 2.3.1.15)	11	0.71007	-0.493966839742049	678250	19.371457616944
NADH pyrophosphatase (EC 3.6.1.22)	7	0.70915	-0.49583727508475	781420	19.5757386553891
Arabinose import ATP-binding protein AraG (EC 3.6.3.17)	4	0.7074	-0.499401875848531	973140	19.8922878465309
RNA chaperone ProQ	2	0.70604	-0.502178174610573	231550	17.8209642314784
Chaperone protein HtpG (Heat shock protein C62.5) (Heat shock protein HtpG) (High temperature protein G)	10	0.70325	-0.507890447347387	1782400	20.7653897071148
Molybdenum cofactor biosynthesis protein B	5	0.7021	-0.510251566879665	692370	19.4011836893365
DNA-directed RNA polymerase subunit alpha (RNAP subunit alpha) (EC 2.7.7.6) (RNA polymerase subunit alpha) (Transcriptase subunit alpha)	3	0.69506	-0.52479057321497	1243800	20.2463230916053
Acetate kinase (EC 2.7.2.1) (Acetokinase)	4	0.69231	-0.530509907723325	633260	19.2724384285878
Bifunctional uridylyltransferase/uridylyl-removing enzyme (UTase/UR) (Bifunctional [protein-PII] modification enzyme) (Bifunctional nitrogen sensor protein) [Includes: [Protein-PII] uridylyltransferase (PII uridylyltransferase) (UTase) (EC 2.7.7.59); [Protein-PII]-UMP uridylyl-removing enzyme (UR) (EC 3.1.4.-)]	19	0.68976	-0.535833627258319	3084600	21.5566519872462
Methionine aminopeptidase (MAP) (MetAP) (EC 3.4.11.18) (Peptidase M)	5	0.67966	-0.557114876441845	1311800	20.3231163494915
PTS system glucose-specific EIIA component (EIIA-Glc) (EIII-Glc) (Glucose-specific phosphotransferase enzyme IIA component)	2	0.67891	-0.558707759238588	769590	19.5537305273855
PhoH-like protein	5	0.6648	-0.589007712779105	1036900	19.9838453347765
Protein YrdA	4	0.66328	-0.592310070196798	597950	19.1896653271413
Antigen 43 (AG43) (Fluffing protein) [Cleaved into: Antigen 43 alpha chain; Antigen 43 beta chain]	6	0.66191	-0.595293027976675	385010	18.5545363923562
Colicin I receptor	17	0.66	-0.599462070416271	2653700	21.339573853003
L-threonine dehydratase biosynthetic IlvA (EC 4.3.1.19) (Threonine deaminase)	6	0.65758	-0.60476167412142	452190	18.7865695622584
Ferric uptake regulation protein (Ferric uptake regulator)	4	0.65719	-0.605617566912477	1813500	20.7903453146324
3-octaprenyl-4-hydroxybenzoate carboxy-lyase (EC 4.1.1.98) (Polyprenyl p-hydroxybenzoate decarboxylase)	3	0.65656	-0.607001236477357	329030	18.3278596051391
Transaldolase B (EC 2.2.1.2)	4	0.64898	-0.623754076363129	226720	17.7905521378054
Universal stress protein F	2	0.64537	-0.63180157912815	155330	17.244976969142
2,3-bisphosphoglycerate-dependent phosphoglycerate mutase (BPG-dependent PGAM) (PGAM) (Phosphoglyceromutase) (dPGM) (EC 5.4.2.11)	3	0.64359	-0.635786185020053	274370	18.065763218275
Cytochrome bo(3) ubiquinol oxidase subunit 1 (EC 1.10.3.10) (Cytochrome b562-o complex subunit I) (Cytochrome o ubiquinol oxidase subunit 1) (Cytochrome o subunit 1) (Oxidase bo(3) subunit 1) (Ubiquinol oxidase chain A) (Ubiquinol oxidase polypeptide I) (Ubiquinol oxidase subunit 1)	5	0.64243	-0.638388829926511	5598000	22.416480056235
Chromosomal replication initiator protein DnaA	4	0.64105	-0.641491207717569	195910	17.5798315146263
Chaperone protein Skp (DNA-binding 17 kDa protein) (Histone-like protein HLP-1) (Seventeen kilodalton protein)	2	0.6272	-0.673002535434241	267600	18.0297185904162
Adenylosuccinate lyase (ASL) (EC 4.3.2.2) (Adenylosuccinase) (ASase)	4	0.62619	-0.675327625480732	388830	18.5687800081478
	4	0.60739	-0.719304938553821	548950	19.0663152246927
Phosphoglycerate kinase (EC 2.7.2.3)	4	0.60143	-0.733531261940927	645300	19.2996104999189
	5	0.6011	-0.734323074827831	960080	19.8727950998483
Ferrienterobactin receptor (Enterobactin outer-membrane receptor)	11	0.59482	-0.749474938055662	1690400	20.6889332417097
RNA polymerase-associated protein RapA (EC 3.6.4.-) (ATP-dependent helicase HepA)	7	0.59385	-0.751829526798197	192570	17.5550234412612
Lipopolysaccharide export system ATP-binding protein LptB (EC 3.6.3.-)	4	0.58205	-0.780785004204577	813560	19.6338892229289
Transcription-repair-coupling factor (TRCF) (EC 3.6.4.-)	10	0.57647	-0.794682564161041	684320	19.3843115867637
Glycerol-3-phosphate regulon repressor	3	0.57136	-0.807528055850746	569290	19.1188042323828
Uncharacterized ABC transporter ATP-binding protein YadG	2	0.56586	-0.821482936334392	328610	18.3260168583489
Tryptophan synthase beta chain (EC 4.2.1.20)	5	0.56514	-0.823319789684988	2318000	21.1444491356686
Tryptophanase (EC 4.1.99.1) (L-tryptophan indole-lyase) (TNase)	3	0.56412	-0.825926008521919	684830	19.3853863769691
Ribonuclease E (RNase E) (EC 3.1.26.12)	23	0.561	-0.833927324053294	14611000	23.8005515860675
GMP synthase [glutamine-hydrolyzing] (EC 6.3.5.2) (GMP synthetase) (GMPS) (Glutamine amidotransferase)	6	0.56042	-0.835419651991669	388600	18.5679263753601
Ribosomal RNA large subunit methyltransferase G (EC 2.1.1.174) (23S rRNA m2G1835 methyltransferase) (rRNA (guanine-N(2)-)-methyltransferase RlmG)	4	0.5602	-0.835986111474943	247910	17.9194569413412
Ribose-phosphate pyrophosphokinase (RPPK) (EC 2.7.6.1) (5-phospho-D-ribosyl alpha-1-diphosphate) (Phosphoribosyl diphosphate synthase) (Phosphoribosyl pyrophosphate synthase) (P-Rib-PP synthase) (PRPP synthase) (PRPPase)	9	0.55348	-0.85339690872449	1146400	20.1286790840369
Elongation factor Tu 2 (EF-Tu 2) (Bacteriophage Q beta RNA-directed RNA polymerase subunit III) (P-43);Elongation factor Tu 1 (EF-Tu 1) (Bacteriophage Q beta RNA-directed RNA polymerase subunit III) (P-43)	19	0.50972	-0.972223133178825	24959000	24.5730567969717
Outer membrane protein A (Outer membrane protein II*)	11	0.50898	-0.974319127128056	6398100	22.6092121107582
Septum site-determining protein MinC	3	0.49572	-1.01240262885954	338940	18.3706703809439
Soluble pyridine nucleotide transhydrogenase (STH) (EC 1.6.1.1) (NAD(P)(+) transhydrogenase [B-specific])	6	0.48021	-1.05826264800335	1128800	20.106358462372
HTH-type transcriptional repressor PurR (Pur regulon repressor) (Purine nucleotide synthesis repressor)	7	0.47921	-1.0612700807509	857790	19.7102649717643
Glutamate--tRNA ligase (EC 6.1.1.17) (Glutamyl-tRNA synthetase) (GluRS)	10	0.46836	-1.0943102262767	2426400	21.2103859723989
Aconitate hydratase B (ACN) (Aconitase) (EC 4.2.1.3) ((2R,3S)-2-methylisocitrate dehydratase) ((2S,3R)-3-hydroxybutane-1,2,3-tricarboxylate dehydratase) (2-methyl-cis-aconitate hydratase) (EC 4.2.1.99) (Iron-responsive protein-like) (IRP-like) (RNA-binding protein)	5	0.46234	-1.11297391010882	573260	19.128830090967
Miniconductance mechanosensitive channel MscM	4	0.45305	-1.14225781553993	458120	18.8053660219489
Chromosome partition protein MukB (Structural maintenance of chromosome-related protein)	7	0.45137	-1.14761756091568	227630	17.796331181462
5-methyltetrahydropteroyltriglutamate--homocysteine methyltransferase (EC 2.1.1.14) (Cobalamin-independent methionine synthase) (Methionine synthase, vitamin-B12 independent isozyme)	8	0.44293	-1.17484937947612	1264400	20.2700215096792
Fructose-bisphosphate aldolase class 2 (FBP aldolase) (FBPA) (EC 4.1.2.13) (Fructose-1,6-bisphosphate aldolase) (Fructose-bisphosphate aldolase class II)	2	0.44027	-1.18353955251074	589480	19.1690833404149
Pyruvate dehydrogenase [ubiquinone] (EC 1.2.5.1) (Pyruvate oxidase) (POX) [Cleaved into: Alpha-peptide]	2	0.43596	-1.19773232330017	197090	17.5884950528659
Cysteine desulfurase IscS (EC 2.8.1.7) (NifS protein homolog) (ThiI transpersulfidase) (TusA transpersulfidase)	6	0.4329	-1.2078942943371	420120	18.680441942037
Sulfate adenylyltransferase subunit 1 (EC 2.7.7.4) (ATP-sulfurylase large subunit) (Sulfate adenylate transferase) (SAT)	8	0.40295	-1.31132726166086	253350	17.9507723032973
Zinc-binding GTPase YeiR (EC 3.6.-.-)	5	0.39212	-1.3506328667922	503830	18.9425775027469
cAMP-activated global transcriptional regulator CRP (Catabolite activator protein) (CAP) (Catabolite gene activator) (cAMP receptor protein) (CRP) (cAMP regulatory protein)	8	0.38539	-1.37560895744569	12017000	23.5185734416814
Dihydrolipoyllysine-residue succinyltransferase component of 2-oxoglutarate dehydrogenase complex (EC 2.3.1.61) (2-oxoglutarate dehydrogenase complex component E2) (OGDC-E2) (Dihydrolipoamide succinyltransferase component of 2-oxoglutarate dehydrogenase complex)	15	0.3791	-1.39934963837881	10273000	23.2923542142319
NADH-quinone oxidoreductase subunit C/D (EC 1.6.5.11) (NADH dehydrogenase I subunit C/D) (NDH-1 subunit C/D) (NUO3/NUO4)	12	0.373	-1.42275246440685	1103900	20.0741780566228
Carbamoyl-phosphate synthase small chain (EC 6.3.5.5) (Carbamoyl-phosphate synthetase glutamine chain)	4	0.37206	-1.42639279956905	457020	18.8018977759772
Polyphosphate kinase (EC 2.7.4.1) (ATP-polyphosphate phosphotransferase) (Polyphosphoric acid kinase)	2	0.34741	-1.52528881308209	253960	17.9542417574735
Phosphate acetyltransferase (EC 2.3.1.8) (Phosphotransacetylase)	5	0.33991	-1.55677528894132	638890	19.2852080329715
Alpha-galactosidase (EC 3.2.1.22) (Melibiase)	7	0.33984	-1.55707242363266	536500	19.0332186454186
HTH-type transcriptional regulator CysB (Cys regulon transcriptional activator)	5	0.3374	-1.56746812126188	1289800	20.2987159439821
GTP pyrophosphokinase (EC 2.7.6.5) ((p)ppGpp synthase) (ATP:GTP 3'-pyrophosphotransferase) (ppGpp synthase I)	5	0.33482	-1.5785423870737	120990	16.8845282860144
Negative modulator of initiation of replication	8	0.33071	-1.5963614245253	2870000	21.4526193062251
Arabinose 5-phosphate isomerase KdsD (API) (L-API) (EC 5.3.1.13)	4	0.30638	-1.70660597139266	690150	19.3965504315991
Ribosomal RNA small subunit methyltransferase I (EC 2.1.1.198) (16S rRNA 2'-O-ribose C1402 methyltransferase) (rRNA (cytidine-2'-O-)-methyltransferase RsmI)	5	0.3042	-1.71690794182495	692490	19.4014337123068
2-oxoglutarate dehydrogenase E1 component (EC 1.2.4.2) (Alpha-ketoglutarate dehydrogenase)	23	0.30216	-1.72661540599664	10439000	23.3154801803205
Lysine--tRNA ligase (EC 6.1.1.6) (Lysyl-tRNA synthetase) (LysRS)	8	0.29901	-1.74173436060057	949820	19.857294609236
ATP-dependent Clp protease ATP-binding subunit ClpA	8	0.28896	-1.79105829695595	551720	19.0735767539432
GTP cyclohydrolase 1 (EC 3.5.4.16) (GTP cyclohydrolase I) (GTP-CH-I)	5	0.28363	-1.81791795807085	8197800	22.9668053625992
Glycerol kinase (EC 2.7.1.30) (ATP:glycerol 3-phosphotransferase) (Glycerokinase) (GK)	6	0.27651	-1.85459643833505	1212600	20.2096722968756
ATP-dependent Clp protease ATP-binding subunit ClpX (ATP-dependent unfoldase ClpX)	9	0.26533	-1.914140289263	2320500	21.1460042668323
Biotin carboxylase (EC 6.3.4.14) (Acetyl-CoA carboxylase subunit A) (ACC) (EC 6.4.1.2)	12	0.24988	-2.0006926598713	3412500	21.7023976153567
Serine hydroxymethyltransferase (SHMT) (Serine methylase) (EC 2.1.2.1)	7	0.23871	-2.06666909005871	1436500	20.4541265621946
Biosynthetic arginine decarboxylase (ADC) (EC 4.1.1.19)	6	0.23738	-2.0747297063115	412740	18.6548737359105
Aerobic C4-dicarboxylate transport protein	2	0.22497	-2.15219546560893	577380	19.1391616090274
Transcription termination factor Rho (EC 3.6.4.-) (ATP-dependent helicase Rho)	16	0.22195	-2.17169338622436	4188000	21.9978300115929
	4	0.21422	-2.22283491566825	361670	18.46431440794
Phospho-2-dehydro-3-deoxyheptonate aldolase, Phe-sensitive (EC 2.5.1.54) (3-deoxy-D-arabino-heptulosonate 7-phosphate synthase) (DAHP synthase) (Phospho-2-keto-3-deoxyheptonate aldolase)	5	0.2056	-2.28208783035557	4677400	22.1572753791673
Outer membrane protein assembly factor BamA (Omp85)	25	0.20434	-2.29095645247529	11267000	23.4256000926517
Threonine--tRNA ligase (EC 6.1.1.3) (Threonyl-tRNA synthetase) (ThrRS)	11	0.19324	-2.37153433700474	5185000	22.3059125583627
S-adenosylmethionine synthase (AdoMet synthase) (EC 2.5.1.6) (MAT) (Methionine adenosyltransferase)	7	0.1736	-2.52616114710497	1653700	20.657266106271
	5	0.16253	-2.62122205762896	572960	19.1280748982079
Glycerol dehydrogenase (GDH) (GLDH) (EC 1.1.1.6)	2	0.15448	-2.69450802548616	3363200	21.6814031437369
Melibiose carrier protein (Melibiose permease) (Melibiose transporter) (Na+ (Li+)/melibiose symporter) (Thiomethylgalactoside permease II)	2	0.14801	-2.75623344293156	390730	18.5758125034154
Bifunctional polymyxin resistance protein ArnA (Polymyxin resistance protein PmrI) [Includes: UDP-4-amino-4-deoxy-L-arabinose formyltransferase (EC 2.1.2.13) (ArnAFT) (UDP-L-Ara4N formyltransferase); UDP-glucuronic acid oxidase, UDP-4-keto-hexauronic acid decarboxylating (EC 1.1.1.305) (ArnADH) (UDP-GlcUA decarboxylase) (UDP-glucuronic acid dehydrogenase)]	9	0.14539	-2.78200005153456	2015100	20.9424200040696
Pyruvate kinase II (EC 2.7.1.40) (PK-2)	11	0.14026	-2.83382446176379	5211000	22.3131288240936
Glucose-6-phosphate 1-dehydrogenase (G6PD) (EC 1.1.1.49) [Cleaved into: Extracellular death factor (EDF)]	9	0.14014	-2.83505929354321	2728400	21.3796237370414
Undecaprenyl-phosphate 4-deoxy-4-formamido-L-arabinose transferase (EC 2.4.2.53) (Polymyxin resistance protein PmrF) (Undecaprenyl-phosphate Ara4FN transferase) (Ara4FN transferase)	8	0.13051	-2.93776774098354	3430500	21.7099874357949
Galactitol 1-phosphate 5-dehydrogenase (EC 1.1.1.251)	11	0.0706	-3.82418800627827	4248200	22.0184202573627
L-arabinose isomerase (EC 5.3.1.4)	4	0.0575	-4.12029423371771	1383600	20.3999954881477

## Sheet: MetNI peptidisc APMS
Protein.Names	Razor + unique peptides 06-Ni-pep_A7_01_11903	SILAC ratio	Log(2) SILAC	Total Intensity	Log(2) Intensity
Lipoprotein 28	5	9.7062	3.27890658769694	3734500	21.8324836675441
D-methionine-binding lipoprotein MetQ	14	8.5414	3.09447255784579	48013000	25.5169217470504
Methionine import ATP-binding protein MetN (EC 3.6.3.-)	26	5.3058	2.40757029478141	515870000	28.942432309273
Outer membrane protein Slp	3	3.6717	1.87644818669472	5282500	22.3327894314844
Phosphatidylserine decarboxylase proenzyme (EC 4.1.1.65) [Cleaved into: Phosphatidylserine decarboxylase alpha chain; Phosphatidylserine decarboxylase beta chain]	4	2.8563	1.51414751500508	2550000	21.2820658164083
D-alanyl-D-alanine carboxypeptidase DacC (DD-carboxypeptidase) (DD-peptidase) (EC 3.4.16.4) (Penicillin-binding protein 6) (PBP-6)	9	2.8224	1.49692246600807	18303000	24.1255768007209
D-alanyl-D-alanine carboxypeptidase DacA (DD-carboxypeptidase) (DD-peptidase) (EC 3.4.16.4) (Beta-lactamase) (EC 3.5.2.6) (Penicillin-binding protein 5) (PBP-5)	6	2.4031	1.26489668446541	2411600	21.2015592038125
Uncharacterized protein YiaF	4	2.3298	1.22020611308018	2302300	21.1346444046677
Sec translocon accessory complex subunit YajC	4	2.2727	1.18440725869306	5855400	22.4813362982582
Protein DcrB	3	2.1316	1.09193673821059	1968800	20.9088851322329
Aspartate carbamoyltransferase catalytic subunit (EC 2.1.3.2) (Aspartate transcarbamylase) (ATCase)	15	2.0077	1.00554371109805	39026000	25.2179322644239
Lipopolysaccharide assembly protein A	1	1.9932	0.995086479134083	1318700	20.330684962769
Aspartate carbamoyltransferase regulatory chain	5	1.9893	0.992260860824945	12175000	23.5374184365192
Bifunctional protein Aas [Includes: 2-acylglycerophosphoethanolamine acyltransferase (EC 2.3.1.40) (2-acyl-GPE acyltransferase) (Acyl-[acyl-carrier-protein]--phospholipid O-acyltransferase); Acyl-[acyl-carrier-protein] synthetase (EC 6.2.1.20) (Acyl-ACP synthetase) (Long-chain-fatty-acid--[acyl-carrier-protein] ligase)]	5	1.9487	0.962512006539503	540390	19.043641452054
Uncharacterized lipoprotein YedD	3	1.9377	0.954345226060097	2524000	21.2672804796446
Uncharacterized lipoprotein YbaY	3	1.882	0.91226662806645	3070100	21.5498542174781
Uncharacterized protein YhiI	3	1.8412	0.880646347674437	834180	19.6699991975406
Alpha-2-macroglobulin (ECAM)	7	1.8261	0.868765771649522	1176800	20.1664377210296
Peptidyl-prolyl cis-trans isomerase D (PPIase D) (EC 5.2.1.8) (Rotamase D)	10	1.7632	0.818196129021708	8443000	23.0093242834338
Osmotically-inducible putative lipoprotein OsmE (Activator of ntr-like gene protein)	3	1.7237	0.785508703560428	3986200	21.9265826657956
Cytoskeleton protein RodZ	4	1.6945	0.760859636821907	1352100	20.3667704252112
3-oxoacyl-[acyl-carrier-protein] synthase 1 (EC 2.3.1.41) (3-oxoacyl-[acyl-carrier-protein] synthase I) (Beta-ketoacyl-ACP synthase I) (KAS I)	2	1.6912	0.758047281833234	1178800	20.1688875348987
Protease 4 (EC 3.4.21.-) (Endopeptidase IV) (Protease IV) (Signal peptide peptidase)	3	1.6818	0.750006150204201	1159000	20.1444491356686
	3	1.6334	0.70787813281685	803490	19.6159205430912
50S ribosomal protein L18 (Large ribosomal subunit protein uL18)	1	1.6171	0.693408896525396	2906100	21.470652916831
PhoH-like protein	5	1.5624	0.643763854337342	3375600	21.6867125278106
Phosphoribosylformylglycinamidine synthase (FGAM synthase) (FGAMS) (EC 6.3.5.3) (Formylglycinamide ribonucleotide amidotransferase) (FGAR amidotransferase) (FGAR-AT)	6	1.5594	0.640991039643907	990000	19.9170689996291
	3	1.5569	0.638676282800239	2018000	20.9444947437684
NADH-quinone oxidoreductase subunit G (EC 1.6.5.11) (NADH dehydrogenase I subunit G) (NDH-1 subunit G) (NUO7)	9	1.5435	0.626205482953038	4098300	21.9665941643788
Outer membrane protein assembly factor BamA (Omp85)	15	1.5434	0.626112010858613	9654200	23.2027252838236
Entericidin B	1	1.5355	0.618708512313788	12175000	23.5374184365192
Chain length determinant protein (Polysaccharide antigen chain regulator)	5	1.5064	0.591104905064779	2882400	21.4588391262015
Catalase HPII (EC 1.11.1.6) (Hydroxyperoxidase II)	9	1.5006	0.585539463352677	2158100	21.0413302859395
Outer membrane protein assembly factor BamB	4	1.5	0.584962500721156	1887800	20.8482744980642
Universal stress protein A	1	1.4717	0.55748361390689	2053900	20.969934510953
30S ribosomal protein S19 (Small ribosomal subunit protein uS19)	1	1.4577	0.543693838288993	4520800	22.1081466636255
Sulfite reductase [NADPH] hemoprotein beta-component (SiR-HP) (SiRHP) (EC 1.8.1.2)	4	1.4477	0.533762670547088	1208500	20.2047860424277
UPF0070 protein YfgM	3	1.445	0.531069492725954	3350700	21.6760310920686
30S ribosomal protein S10 (Small ribosomal subunit protein uS10)	3	1.4249	0.510860673967616	32411000	24.9499801980664
Outer membrane protein assembly factor BamC	5	1.4046	0.49015934028372	2768100	21.4004646318429
Outer membrane protein C (Outer membrane protein 1B) (Porin OmpC)	4	1.4012	0.486662893252614	1178800	20.1688875348987
Lipoprotein NlpI	2	1.3954	0.480678738754799	904860	19.787335070025
Quinoprotein glucose dehydrogenase (EC 1.1.5.2) (Glucose dehydrogenase [pyrroloquinoline-quinone])	9	1.3922	0.477366480067235	6848500	22.7073566041806
UDP-N-acetylglucosamine--N-acetylmuramyl-(pentapeptide) pyrophosphoryl-undecaprenol N-acetylglucosamine transferase (EC 2.4.1.227) (Undecaprenyl-PP-MurNAc-pentapeptide-UDPGlcNAc GlcNAc transferase)	3	1.372	0.456280481510725	832010	19.6662413427836
Pyruvate dehydrogenase E1 component (PDH E1 component) (EC 1.2.4.1)	32	1.3675	0.451540833017832	48487000	25.5310946579125
Protein YdgA	7	1.3413	0.423631951714348	4198900	22.0015799990256
30S ribosomal protein S5 (Small ribosomal subunit protein uS5)	3	1.3307	0.412185359156707	2152500	21.0375818069463
Inner membrane protein YhcB	4	1.3304	0.41186007373782	2550600	21.2824052341351
60 kDa chaperonin (GroEL protein) (Protein Cpn60)	8	1.3082	0.387583119544611	4993100	22.2515043700557
30S ribosomal protein S18 (Small ribosomal subunit protein bS18)	3	1.3067	0.385927956594824	7214000	22.7823679924497
Outer membrane protein TolC (Multidrug efflux pump subunit TolC) (Outer membrane factor TolC)	5	1.3066	0.385817544851695	4122100	21.9749480736565
30S ribosomal protein S16 (Small ribosomal subunit protein bS16)	6	1.3053	0.384381422712236	3855300	21.8784116970838
Lipopolysaccharide core biosynthesis protein RfaG (EC 2.4.-.-) (Glucosyltransferase I)	5	1.2826	0.359071312288344	1551600	20.5653252503061
Alcohol dehydrogenase, propanol-preferring (EC 1.1.1.1)	3	1.2487	0.320426911293992	570620	19.1221707881198
Phospho-2-dehydro-3-deoxyheptonate aldolase, Tyr-sensitive (EC 2.5.1.54) (3-deoxy-D-arabino-heptulosonate 7-phosphate synthase) (DAHP synthase) (Phospho-2-keto-3-deoxyheptonate aldolase)	2	1.2088	0.27357556561538	306820	18.227033002129
	3	1.2022	0.265676925172169	783320	19.579242268673
50S ribosomal protein L5 (Large ribosomal subunit protein uL5)	7	1.1748	0.232415170775402	8475600	23.0148840716598
Uncharacterized tRNA/rRNA methyltransferase YfiF (EC 2.1.1.-)	8	1.1709	0.227617868610658	7443400	22.8275303361786
30S ribosomal protein S15 (Small ribosomal subunit protein uS15)	4	1.1641	0.219214995795424	102030000	26.6044181709785
ATP synthase subunit beta (EC 7.1.2.2) (ATP synthase F1 sector subunit beta) (F-ATPase subunit beta)	11	1.1591	0.213005038545048	4033200	21.9434935178039
Inosine-5'-monophosphate dehydrogenase (IMP dehydrogenase) (IMPD) (IMPDH) (EC 1.1.1.205)	2	1.1431	0.19295161806985	3015700	21.5240614866445
Arginine transport ATP-binding protein ArtP (EC 3.6.3.-)	3	1.1337	0.181038924431668	2795200	21.4145200826915
	12	1.1295	0.175684270730997	9777100	23.2209751780558
Antigen 43 (AG43) (Fluffing protein) [Cleaved into: Antigen 43 alpha chain; Antigen 43 beta chain]	4	1.1093	0.149649581894975	1786700	20.7688659849872
NADH-quinone oxidoreductase subunit C/D (EC 1.6.5.11) (NADH dehydrogenase I subunit C/D) (NDH-1 subunit C/D) (NUO3/NUO4)	12	1.0975	0.134220939760633	6114600	22.5438266940962
50S ribosomal protein L21 (Large ribosomal subunit protein bL21)	4	1.0949	0.130799110838194	4648300	22.1482717522115
Histidine biosynthesis bifunctional protein HisB [Includes: Histidinol-phosphatase (EC 3.1.3.15); Imidazoleglycerol-phosphate dehydratase (IGPD) (EC 4.2.1.19)]	8	1.0935	0.128953220386006	6273200	22.580770128212
Acetylornithine/succinyldiaminopimelate aminotransferase (ACOAT) (DapATase) (Succinyldiaminopimelate transferase) (EC 2.6.1.11) (EC 2.6.1.17)	5	1.0853	0.11809388938682	3289700	21.6495245945472
Methyl-accepting chemotaxis protein I (MCP-I) (Serine chemoreceptor protein)	8	1.0817	0.113300435833361	2593200	21.3063020473554
50S ribosomal protein L7/L12 (L8) (Large ribosomal subunit protein bL12)	4	1.08	0.111031312388744	8022100	22.9355485195959
GMP synthase [glutamine-hydrolyzing] (EC 6.3.5.2) (GMP synthetase) (GMPS) (Glutamine amidotransferase)	8	1.0782	0.108624814681649	1887600	20.8481216459116
30S ribosomal protein S2 (Small ribosomal subunit protein uS2)	10	1.0777	0.107955630087393	21151000	24.3342225384757
50S ribosomal protein L14 (Large ribosomal subunit protein uL14)	3	1.0674	0.0941009164388665	1390100	20.4067572395498
ATP-dependent RNA helicase HrpA (EC 3.6.4.13)	7	1.0653	0.0912597661926783	1721900	20.7155699294264
50S ribosomal protein L13 (Large ribosomal subunit protein uL13)	8	1.0634	0.0886843715333915	63258000	25.9147446077416
Adenylosuccinate lyase (ASL) (EC 4.3.2.2) (Adenylosuccinase) (ASase)	6	1.0624	0.0873270517974754	3125500	21.5756555718409
Catalase-peroxidase (CP) (EC 1.11.1.21) (Hydroperoxidase I) (HPI) (Peroxidase/catalase)	4	1.0573	0.0803847874146045	818600	19.6427991412178
Delta-aminolevulinic acid dehydratase (ALAD) (ALADH) (EC 4.2.1.24) (Porphobilinogen synthase)	6	1.0487	0.0686020273786715	15842000	23.9172511465949
NADP-specific glutamate dehydrogenase (NADP-GDH) (EC 1.4.1.4)	4	1.0454	0.0640550644104434	2652500	21.3389213204642
30S ribosomal protein S7 (Small ribosomal subunit protein uS7)	5	1.0402	0.056860943046751	4497600	22.1007239281551
LPS-assembly protein LptD (Organic solvent tolerance protein)	3	1.0374	0.0529722748139887	567840	19.1151249539483
30S ribosomal protein S9 (Small ribosomal subunit protein uS9)	5	1.0328	0.0465609057577412	2331300	21.1527032368812
Selenocysteine-specific elongation factor (SelB translation factor)	12	1.0212	0.0302654428576696	4049800	21.9494192313627
Elongation factor Tu 2 (EF-Tu 2) (Bacteriophage Q beta RNA-directed RNA polymerase subunit III) (P-43);Elongation factor Tu 1 (EF-Tu 1) (Bacteriophage Q beta RNA-directed RNA polymerase subunit III) (P-43)	14	1.021	0.0299828662157143	26736000	24.6722803027233
tRNA (guanine-N(7)-)-methyltransferase (EC 2.1.1.33) (tRNA (guanine(46)-N(7))-methyltransferase) (tRNA(m7G46)-methyltransferase)	3	1.0172	0.024603367140657	2226200	21.0861517783772
Chaperone protein DnaJ (HSP40) (Heat shock protein J)	4	1.0164	0.0234682805039054	3113700	21.5701985190842
Carbonic anhydrase 2 (EC 4.2.1.1) (Carbonate dehydratase 2)	5	1.0142	0.0203421795171858	4430900	22.0791683366508
Cytochrome bo(3) ubiquinol oxidase subunit 2 (Cytochrome b562-o complex subunit II) (Cytochrome o ubiquinol oxidase subunit 2) (Cytochrome o subunit 2) (Oxidase bo(3) subunit 2) (Ubiquinol oxidase chain B) (Ubiquinol oxidase polypeptide II) (Ubiquinol oxidase subunit 2)	9	1.014	0.0200576523412535	46361000	25.4664083496129
Bifunctional aspartokinase/homoserine dehydrogenase 1 (Aspartokinase I/homoserine dehydrogenase I) (AKI-HDI) [Includes: Aspartokinase (EC 2.7.2.4); Homoserine dehydrogenase (EC 1.1.1.3)]	12	1.0108	0.0154975693953256	3105500	21.5663941371088
GTP cyclohydrolase 1 (EC 3.5.4.16) (GTP cyclohydrolase I) (GTP-CH-I)	8	1.0083	0.0119249484797086	21538000	24.3603809529031
ATP synthase epsilon chain (ATP synthase F1 sector epsilon subunit) (F-ATPase epsilon subunit)	1	1.0077	0.0110662014062054	5383800	22.3601933863364
Universal stress protein E	2	1.0022	0.00317044288012818	422200	18.6875670531219
30S ribosomal protein S3 (Small ribosomal subunit protein uS3)	5	1.0013	0.00187428553135083	4153900	21.9860350548277
Protein HemX (ORF X)	4	0.99667	-0.0048121912388182	890450	19.7641750787146
50S ribosomal protein L17 (Large ribosomal subunit protein bL17)	4	0.99494	-0.00731856854007965	6391200	22.6076554037065
Probable protease SohB (EC 3.4.21.-)	5	0.99453	-0.0079132042723485	2379500	21.1822270238226
50S ribosomal protein L6 (Large ribosomal subunit protein uL6)	4	0.9906	-0.0136254739150351	2834600	21.4347137352743
PTS system fructose-specific EIIB'BC component (EIIB'BC-Fru) [Includes: PTS system fructose-specific EIIB component (EC 2.7.1.202) (EIII-Fru) (Fructose-specific phosphotransferase enzyme IIB component); PTS system fructose-specific EIIC component (Fructose permease IIC component)]	10	0.99021	-0.0141935759270577	16786000	24.0007551501339
RNA-binding protein Hfq (HF-1) (Host factor-I protein) (HF-I)	5	0.98126	-0.0272926434460321	11273000	23.4263681645638
DNA-directed RNA polymerase subunit beta (RNAP subunit beta) (EC 2.7.7.6) (RNA polymerase subunit beta) (Transcriptase subunit beta)	12	0.97869	-0.031076136269936	3937000	21.9086652818211
	5	0.97613	-0.0348547976464565	1644100	20.6488666208477
Outer membrane protein A (Outer membrane protein II*)	10	0.9708	-0.0427539863983157	18810000	24.1649965130726
	2	0.96836	-0.0463846076544842	757460	19.5308101790946
	3	0.96434	-0.0523862037927099	2956300	21.4953612483317
Ferrienterobactin receptor (Enterobactin outer-membrane receptor)	4	0.95598	-0.0649476589016742	1711900	20.7071669990319
Uncharacterized protein YbhP	4	0.95407	-0.0678329744133795	685350	19.3864814177043
50S ribosomal protein L16 (Large ribosomal subunit protein uL16)	3	0.94877	-0.0758697021361263	2515600	21.2624711100255
Threonine--tRNA ligase (EC 6.1.1.3) (Threonyl-tRNA synthetase) (ThrRS)	7	0.94154	-0.0869057078802529	8747400	23.0604228360395
Glutamine synthetase (GS) (EC 6.3.1.2) (Glutamate--ammonia ligase) (Glutamine synthetase I beta) (GSI beta)	4	0.94039	-0.0886688972693714	1225000	20.224350318552
Enolase (EC 4.2.1.11) (2-phospho-D-glycerate hydro-lyase) (2-phosphoglycerate dehydratase)	4	0.93804	-0.092278651281863	2952700	21.4936033526506
Phosphoenolpyruvate-protein phosphotransferase (EC 2.7.3.9) (Phosphotransferase system, enzyme I)	2	0.9343	-0.0980422269456954	425690	18.6994436742114
50S ribosomal protein L20 (Large ribosomal subunit protein bL20)	2	0.93017	-0.104433684318721	1952900	20.8971866459438
	6	0.92292	-0.115722496426193	2021000	20.9466378910418
ATP synthase subunit b (ATP synthase F(0) sector subunit b) (ATPase subunit I) (F-type ATPase subunit b) (F-ATPase subunit b)	6	0.9208	-0.119040261417219	5901800	22.4927236009214
50S ribosomal protein L25 (Large ribosomal subunit protein bL25)	2	0.9063	-0.141939410100352	1818600	20.7943968272802
Aconitate hydratase B (ACN) (Aconitase) (EC 4.2.1.3) ((2R,3S)-2-methylisocitrate dehydratase) ((2S,3R)-3-hydroxybutane-1,2,3-tricarboxylate dehydratase) (2-methyl-cis-aconitate hydratase) (EC 4.2.1.99) (Iron-responsive protein-like) (IRP-like) (RNA-binding protein)	5	0.90599	-0.142432968490056	533670	19.025588387641
Glucosamine-6-phosphate deaminase (EC 3.5.99.6) (GlcN6P deaminase) (GNPDA) (Glucosamine-6-phosphate isomerase)	1	0.90107	-0.15028890812703	1381300	20.3975952571379
Adenylosuccinate synthetase (AMPSase) (AdSS) (EC 6.3.4.4) (IMP--aspartate ligase)	3	0.90005	-0.151922945946855	1235400	20.2365468051281
DNA-directed RNA polymerase subunit alpha (RNAP subunit alpha) (EC 2.7.7.6) (RNA polymerase subunit alpha) (Transcriptase subunit alpha)	5	0.8964	-0.157785446039056	3928100	21.9054002269981
DNA-directed RNA polymerase subunit beta' (RNAP subunit beta') (EC 2.7.7.6) (RNA polymerase subunit beta') (Transcriptase subunit beta')	10	0.89475	-0.160443456245703	1728000	20.7206717868256
Alkyl hydroperoxide reductase subunit F (EC 1.8.1.-) (Alkyl hydroperoxide reductase F52A protein)	11	0.89241	-0.1642214149342	11206000	23.4177680618923
NAD(P) transhydrogenase subunit beta (EC 7.1.1.1) (Nicotinamide nucleotide transhydrogenase subunit beta) (Pyridine nucleotide transhydrogenase subunit beta)	3	0.8876	-0.172018427352438	2452200	21.2256452185165
Probable formate transporter 1 (Formate channel 1)	2	0.88499	-0.176266941422708	13555000	23.6923217773872
2-oxoglutarate dehydrogenase E1 component (EC 1.2.4.2) (Alpha-ketoglutarate dehydrogenase)	26	0.88479	-0.176593014730583	45805000	25.4490017533959
Vitamin B12 transporter BtuB (Cobalamin receptor) (Outer membrane cobalamin translocator)	4	0.88106	-0.182687825168496	492600	18.9100571022737
Quinone-dependent D-lactate dehydrogenase (EC 1.1.5.12) ((R)-lactate:quinone 2-oxidoreductase) (D-lactate dehydrogenase) (D-LDH) (Respiratory D-lactate dehydrogenase)	8	0.87638	-0.19037153414441	3462200	21.7232576362223
Tryptophan synthase beta chain (EC 4.2.1.20)	3	0.86464	-0.209828515111127	2469600	21.2358459573899
Isocitrate lyase (ICL) (EC 4.1.3.1) (Isocitrase) (Isocitratase)	4	0.86346	-0.211798748793011	1369700	20.3854285092932
NAD(P) transhydrogenase subunit alpha (EC 7.1.1.1) (Nicotinamide nucleotide transhydrogenase subunit alpha) (Pyridine nucleotide transhydrogenase subunit alpha)	2	0.86292	-0.212701279345366	882590	19.7513838756912
50S ribosomal protein L2 (Large ribosomal subunit protein uL2)	8	0.86089	-0.216099185479837	33818000	25.0112880053491
30S ribosomal protein S4 (Small ribosomal subunit protein uS4)	7	0.8532	-0.229044129208878	5230300	22.3184622683967
Bifunctional chorismate mutase/prephenate dehydratase (Chorismate mutase-prephenate dehydratase) (P-protein) [Includes: Chorismate mutase (CM) (EC 5.4.99.5); Prephenate dehydratase (PDT) (EC 4.2.1.51)]	5	0.84408	-0.244548354090349	812740	19.6324343744584
Preprotein translocase subunit SecY	4	0.83771	-0.255477199377479	2075600	20.9850970103135
Dihydrolipoyl dehydrogenase (EC 1.8.1.4) (Dihydrolipoamide dehydrogenase) (E3 component of pyruvate and 2-oxoglutarate dehydrogenases complexes) (Glycine cleavage system L protein)	16	0.83545	-0.259374606410069	16123000	23.9426168747297
NADH dehydrogenase (EC 1.6.99.3)	12	0.83405	-0.261794221301574	9977900	23.2503047798384
50S ribosomal protein L1 (Large ribosomal subunit protein uL1)	8	0.8299	-0.268990587579271	12010000	23.5177328152551
Serine hydroxymethyltransferase (SHMT) (Serine methylase) (EC 2.1.2.1)	6	0.8271	-0.273866326818103	6345500	22.5973024164639
Glyceraldehyde-3-phosphate dehydrogenase A (GAPDH-A) (EC 1.2.1.12) (NAD-dependent glyceraldehyde-3-phosphate dehydrogenase)	5	0.82527	-0.277061898033086	1761600	20.7484549433391
Lysine--tRNA ligase (EC 6.1.1.6) (Lysyl-tRNA synthetase) (LysRS)	4	0.8237	-0.279809106167403	801930	19.6131167846078
Cold shock-like protein CspC (CSP-C)	2	0.82263	-0.281684409309674	2082100	20.9896079300074
50S ribosomal protein L24 (Large ribosomal subunit protein uL24)	2	0.81774	-0.290285882937757	729270	19.4760935215598
Outer membrane lipoprotein SlyB	4	0.81695	-0.291680311448399	2367400	21.1748720562423
Cytochrome bo(3) ubiquinol oxidase subunit 1 (EC 1.10.3.10) (Cytochrome b562-o complex subunit I) (Cytochrome o ubiquinol oxidase subunit 1) (Cytochrome o subunit 1) (Oxidase bo(3) subunit 1) (Ubiquinol oxidase chain A) (Ubiquinol oxidase polypeptide I) (Ubiquinol oxidase subunit 1)	5	0.81566	-0.293960190893038	16114000	23.9418113248519
Lipopolysaccharide 1,2-N-acetylglucosaminetransferase (EC 2.4.1.56)	2	0.81183	-0.300750441164239	572480	19.1268657669393
Ribosomal RNA large subunit methyltransferase J (EC 2.1.1.266) (23S rRNA (adenine(2030)-N6)-methyltransferase) (23S rRNA m6A2030 methyltransferase)	9	0.80909	-0.305627903564837	4676300	22.1569360557868
ATP synthase subunit alpha (EC 7.1.2.2) (ATP synthase F1 sector subunit alpha) (F-ATPase subunit alpha)	10	0.80871	-0.306305643861066	6919000	22.7221321101787
Acetylornithine deacetylase (AO) (Acetylornithinase) (EC 3.5.1.16) (N-acetylornithinase) (NAO)	4	0.80168	-0.318901611997464	1542200	20.5565584424226
Carbamoyl-phosphate synthase small chain (EC 6.3.5.5) (Carbamoyl-phosphate synthetase glutamine chain)	6	0.79852	-0.324599552573995	894450	19.7706413119201
DNA-binding protein HU-alpha (HU-2) (NS2)	4	0.79502	-0.330936940732028	5452700	22.3785393518824
Hydroxycarboxylate dehydrogenase B (EC 1.1.1.-) (2-oxoglutarate reductase) (Hydroxyphenylpyruvate reductase) (EC 1.1.1.237) (Phenylpyruvate reductase)	4	0.79091	-0.338414559406722	3174700	21.5981888371267
Aldehyde-alcohol dehydrogenase [Includes: Alcohol dehydrogenase (ADH) (EC 1.1.1.1); Acetaldehyde dehydrogenase [acetylating] (ACDH) (EC 1.2.1.10); Pyruvate-formate-lyase deactivase (PFL deactivase)]	19	0.78646	-0.346554704032343	14270000	23.7664819990252
Cytochrome bd-I ubiquinol oxidase subunit 1 (EC 1.10.3.14) (Cytochrome bd-I oxidase subunit I) (Cytochrome d ubiquinol oxidase subunit I)	4	0.78566	-0.348022983975773	705640	19.4285728184473
Ribonuclease E (RNase E) (EC 3.1.26.12)	20	0.78254	-0.353763596737664	15392000	23.8756773684321
ATP-dependent zinc metalloprotease FtsH (EC 3.4.24.-) (Cell division protease FtsH)	7	0.76305	-0.390150499965664	5502300	22.3916033706855
Triosephosphate isomerase (TIM) (TPI) (EC 5.3.1.1) (Triose-phosphate isomerase)	3	0.75684	-0.401939755844513	2203900	21.0716273337155
Cytosol aminopeptidase (EC 3.4.11.1) (Aminopeptidase A/I) (Leucine aminopeptidase) (LAP) (EC 3.4.11.10) (Leucyl aminopeptidase)	3	0.75432	-0.406751416916905	1892000	20.8514806580015
Citrate synthase (EC 2.3.3.16)	5	0.74048	-0.433467325329322	918500	19.8089201957734
cAMP-activated global transcriptional regulator CRP (Catabolite activator protein) (CAP) (Catabolite gene activator) (cAMP receptor protein) (CRP) (cAMP regulatory protein)	2	0.73944	-0.435495006676304	1239300	20.241094035352
Dihydrolipoyllysine-residue acetyltransferase component of pyruvate dehydrogenase complex (EC 2.3.1.12) (Dihydrolipoamide acetyltransferase component of pyruvate dehydrogenase complex) (E2)	12	0.73888	-0.436588016662697	7356500	22.8105881082102
Uncharacterized protein YncE	6	0.73738	-0.439519808225251	4835500	22.2052336441814
ATP synthase subunit delta (ATP synthase F(1) sector subunit delta) (F-type ATPase subunit delta) (F-ATPase subunit delta)	1	0.73355	-0.447032789120155	1259100	20.2639614383818
50S ribosomal protein L3 (Large ribosomal subunit protein uL3)	3	0.7326	-0.44890239384089	2743700	21.3876913131624
Intermembrane phospholipid transport system binding protein MlaD	5	0.73213	-0.449828252794403	2144500	21.0322098852976
Uncharacterized protein YqjD	4	0.72517	-0.463608852301803	10387000	23.3082756957312
D-amino acid dehydrogenase (EC 1.4.99.-) (D-alanine dehydrogenase)	7	0.71992	-0.474091496687585	356770	18.444634781761
Bifunctional uridylyltransferase/uridylyl-removing enzyme (UTase/UR) (Bifunctional [protein-PII] modification enzyme) (Bifunctional nitrogen sensor protein) [Includes: [Protein-PII] uridylyltransferase (PII uridylyltransferase) (UTase) (EC 2.7.7.59); [Protein-PII]-UMP uridylyl-removing enzyme (UR) (EC 3.1.4.-)]	7	0.71787	-0.478205486683267	341800	18.3827928714509
50S ribosomal protein L9 (Large ribosomal subunit protein bL9)	4	0.69677	-0.521245586023718	5533400	22.3997347868258
Chaperone protein Skp (DNA-binding 17 kDa protein) (Histone-like protein HLP-1) (Seventeen kilodalton protein)	3	0.68653	-0.542605330224281	4185200	21.996865136452
Multiphosphoryl transfer protein (MTP) (Diphosphoryl transfer protein) (DTP) (Phosphotransferase FPr protein) (Pseudo-HPr) [Includes: Phosphocarrier protein HPr (Protein H); PTS system fructose-specific EIIA component (EIIA-Fru) (EIII-Fru) (Fructose-specific phosphotransferase enzyme IIA component)]	9	0.68373	-0.548501367088671	10930000	23.3817900652214
Dihydrolipoyllysine-residue succinyltransferase component of 2-oxoglutarate dehydrogenase complex (EC 2.3.1.61) (2-oxoglutarate dehydrogenase complex component E2) (OGDC-E2) (Dihydrolipoamide succinyltransferase component of 2-oxoglutarate dehydrogenase complex)	10	0.6837	-0.548564669562996	8873400	23.0810555738808
Polyribonucleotide nucleotidyltransferase (EC 2.7.7.8) (Polynucleotide phosphorylase) (PNPase)	5	0.67967	-0.557093649881099	1231000	20.2313993311465
Protein HemY	4	0.67274	-0.571879053923392	2784500	21.4089868619591
30S ribosomal protein S1 (Bacteriophage Q beta RNA-directed RNA polymerase subunit I) (Small ribosomal subunit protein bS1)	11	0.66073	-0.597867244089773	11496000	23.4546286311194
Multidrug efflux pump subunit AcrA (AcrAB-TolC multidrug efflux pump subunit AcrA) (Acridine resistance protein A)	9	0.65737	-0.605222476374224	5415800	22.3687430319565
D-tagatose-1,6-bisphosphate aldolase subunit GatY (TBPA) (TagBP aldolase) (EC 4.1.2.40) (D-tagatose-bisphosphate aldolase class II) (Tagatose-bisphosphate aldolase)	4	0.6542	-0.612196335466671	1358500	20.3735831348841
Translation initiation factor IF-3 [Cleaved into: Translation initiation factor IF-3, N-terminally processed; Translation initiation factor IF-3S]	4	0.65337	-0.614027881073812	2010600	20.9391946617004
Glutamine--fructose-6-phosphate aminotransferase [isomerizing] (EC 2.6.1.16) (D-fructose-6-phosphate amidotransferase) (GFAT) (Glucosamine-6-phosphate synthase) (Hexosephosphate aminotransferase) (L-glutamine--D-fructose-6-phosphate amidotransferase)	16	0.65102	-0.619226229748982	17975000	24.0994884348761
Multidrug efflux pump subunit AcrB (AcrAB-TolC multidrug efflux pump subunit AcrB) (Acridine resistance protein B);Multidrug export protein AcrF (Acriflavine resistance protein F) (Protein EnvD)	22	0.63352	-0.65853792943547	113640000	26.759895495739
Formate acetyltransferase 1 (EC 2.3.1.54) (Pyruvate formate-lyase 1)	4	0.62998	-0.666622066844373	718040	19.4537046892292
Pyruvate kinase II (EC 2.7.1.40) (PK-2)	2	0.58132	-0.782595550321588	889780	19.7630891451857
Uncharacterized ABC transporter ATP-binding protein YadG	4	0.57508	-0.798165430004081	804460	19.6176611623385
ATP-dependent RNA helicase RhlE (EC 3.6.4.13)	8	0.56918	-0.813043125938901	1413800	20.4311466163343
Colicin I receptor	7	0.56631	-0.8203360894782	3231200	21.6236386204778
Catecholate siderophore receptor Fiu (Ferric iron uptake protein) (TonB-dependent receptor Fiu)	9	0.56629	-0.8203870410954	6894500	22.7170144983402
Uncharacterized protein YbiB	5	0.54513	-0.87532777694187	3993400	21.9291861564752
Membrane protein insertase YidC (Foldase YidC) (Inner membrane protein YidC) (Membrane integrase YidC) (Oxa1Ec)	10	0.53031	-0.915092141403265	24308000	24.5349278612071
Uncharacterized protein YibN	5	0.51111	-0.968294276569638	6736900	22.6836534539878
Elongation factor G (EF-G)	7	0.44513	-1.16770135888551	1976600	20.9145895150482
Miniconductance mechanosensitive channel MscM	3	0.4451	-1.16779859409718	2172300	21.050791925977
Transcription termination factor Rho (EC 3.6.4.-) (ATP-dependent helicase Rho)	8	0.44453	-1.16964730937395	3126400	21.5760709417431
Succinylornithine transaminase (SOAT) (EC 2.6.1.81) (Carbon starvation protein C) (Succinylornithine aminotransferase)	5	0.44379	-1.17205093549338	801640	19.6125949719443
Flagellin	13	0.42176	-1.24550581942876	36198000	25.1094066524098
Protein translocase subunit SecF (Sec translocon accessory complex subunit SecF)	4	0.32284	-1.63110875472744	2440000	21.2184497171123
Protein translocase subunit SecD (Sec translocon accessory complex subunit SecD)	13	0.30777	-1.70007548362594	4054500	21.9510925819179
