# Supplementary figures and images for: Profiling the Escherichia coli membrane protein interactome captured in Peptidisc libraries
Source: eLife journal article supplement (doi:10.7554/elife.46615), 2019-07-31

FIGURE S1

*A*

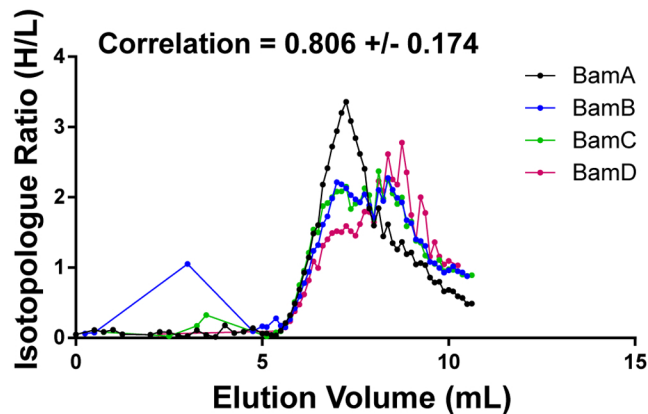

*B*

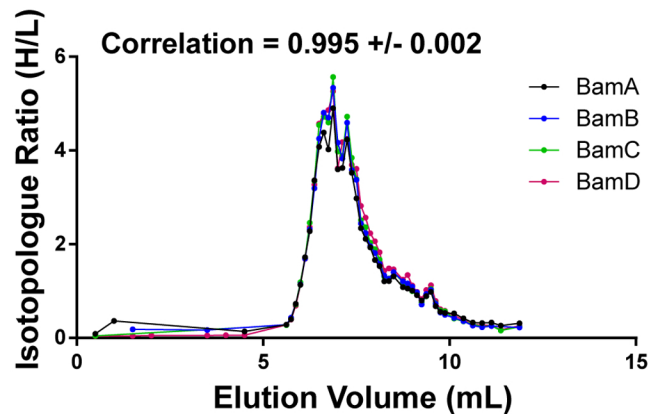

*C*

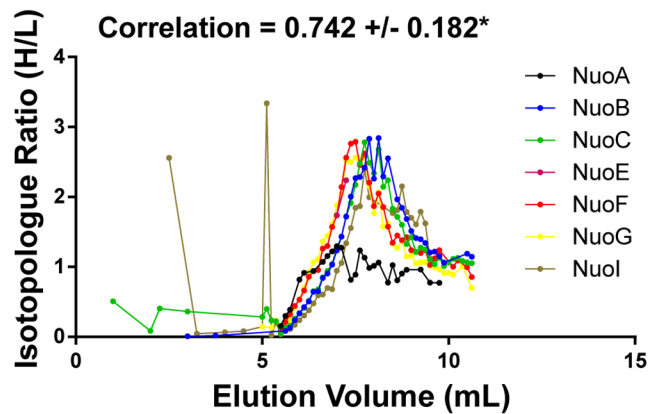

*D*

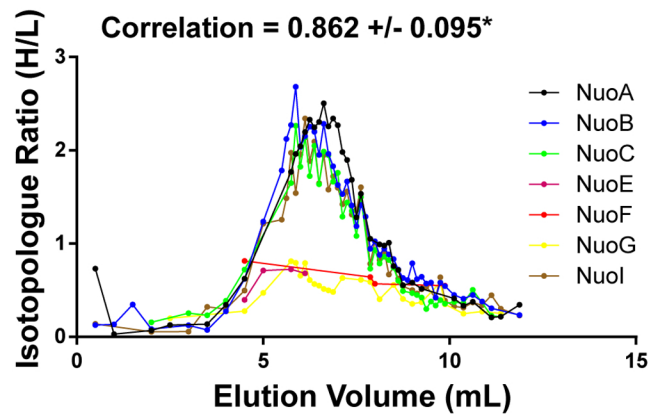

Supplement: supp [file elife_poa_e46615_Figure_3_figure_supplement_1.pdf › elife_poa_e46615_Figure_3_figure_supplement_1.pdf]

**FIGURE S2**

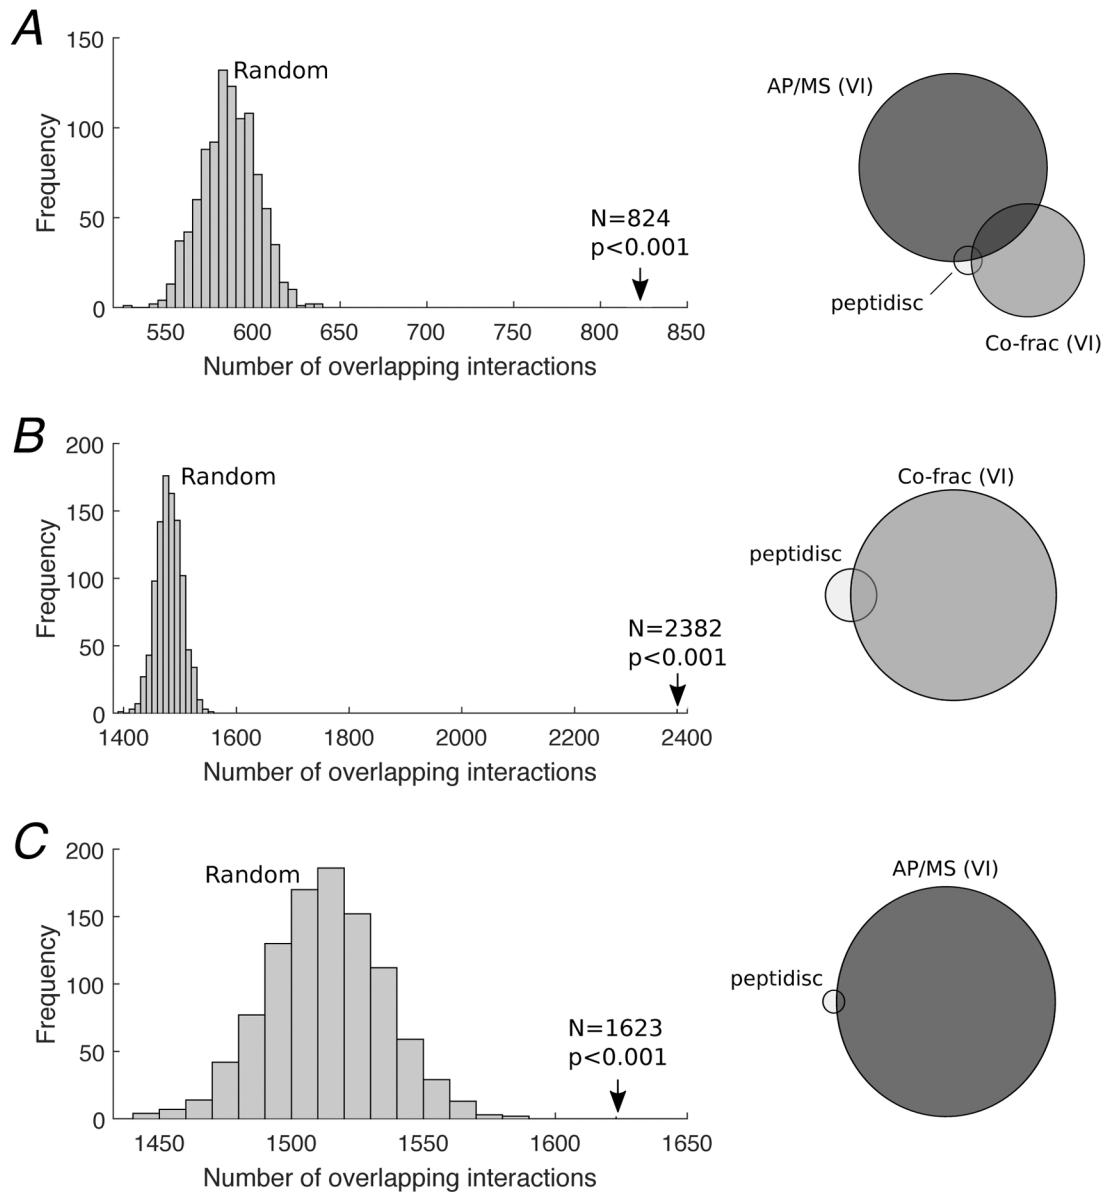

Supplement: supp [file elife_poa_e46615_Figure_5_figure_supplement_1.pdf › elife_poa_e46615_Figure_5_figure_supplement_1.pdf]

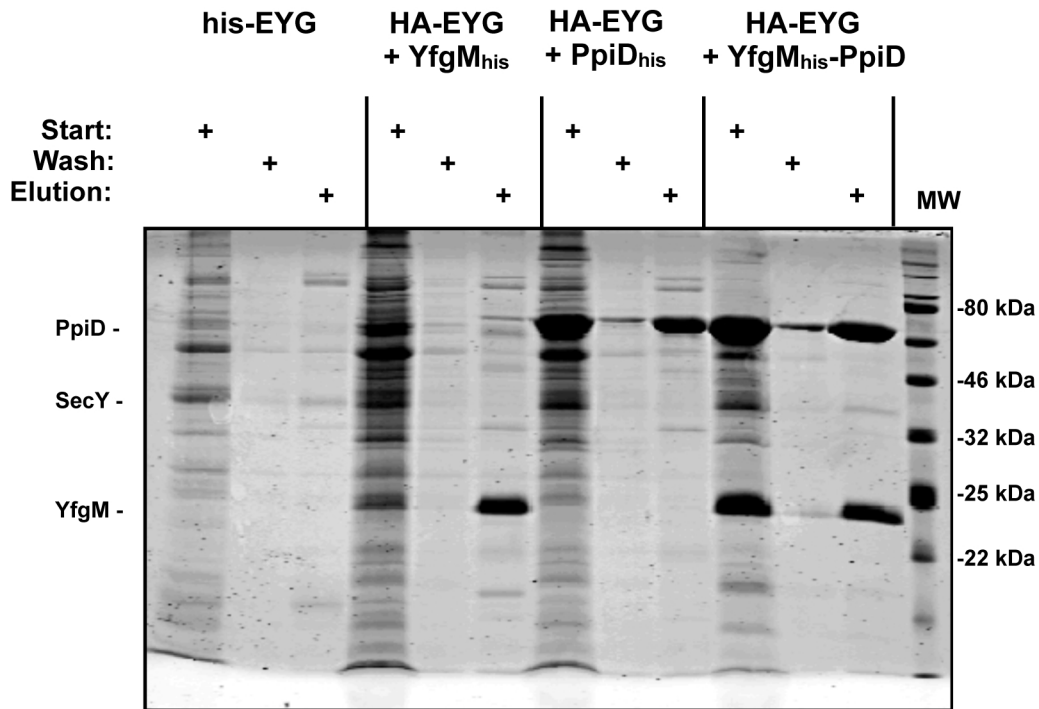

anti-SecY:

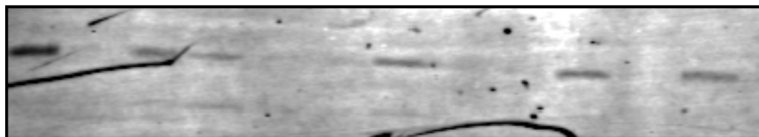

Supplement: supp [file elife_poa_e46615_Figure_6_figure_supplement_1.pdf › elife_poa_e46615_Figure_6_figure_supplement_1.pdf]

**A**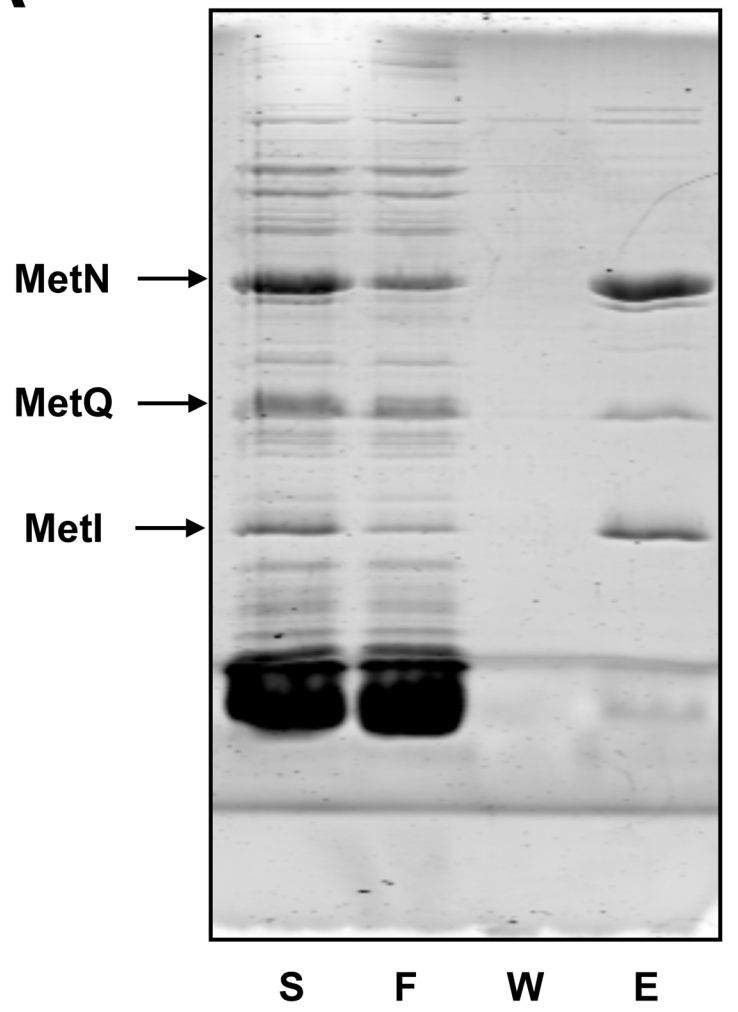**WT MetQ****B**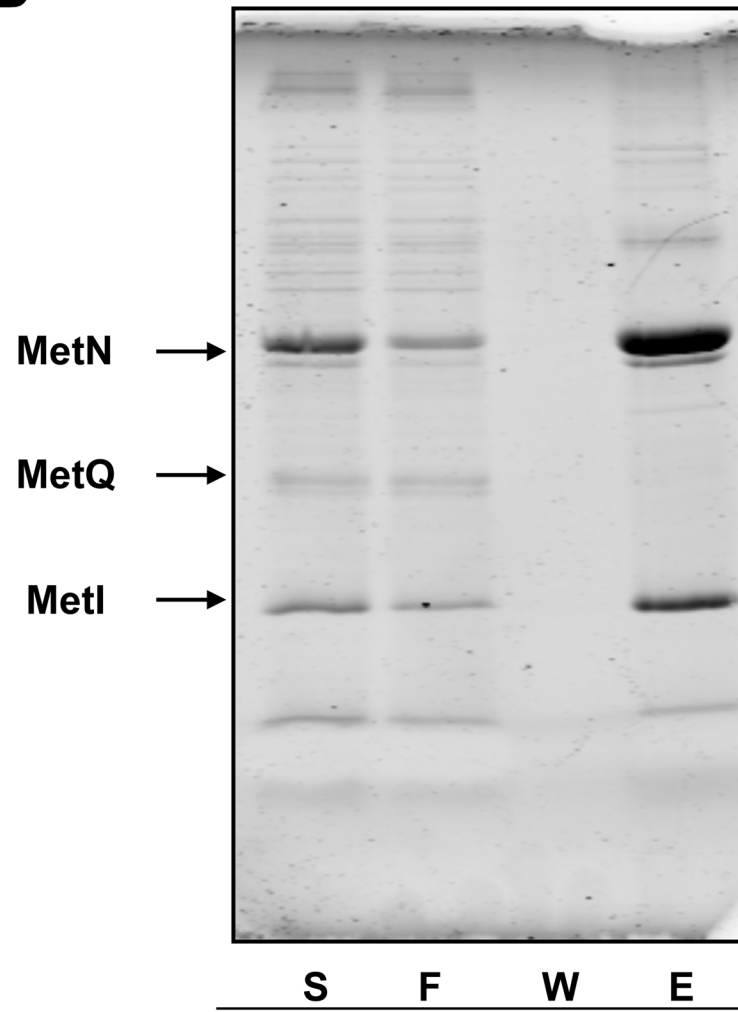**MetQ C23A**

Supplement: supp [file elife_poa_e46615_Figure_8_Figure_Supplement_2.pdf › elife_poa_e46615_Figure_8_Figure_Supplement_2.pdf]

**A**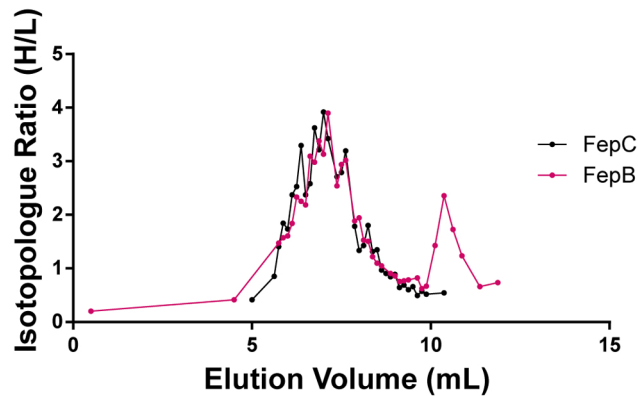**B**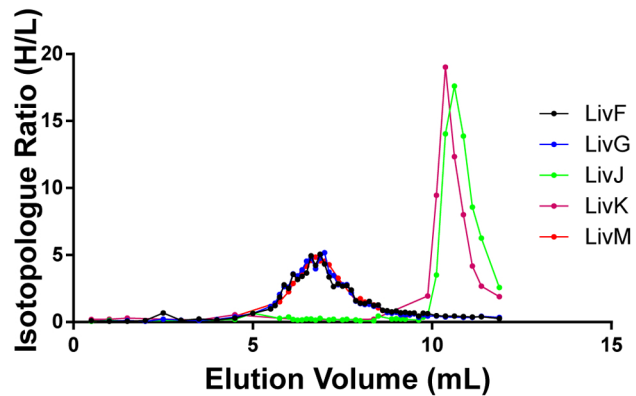**C**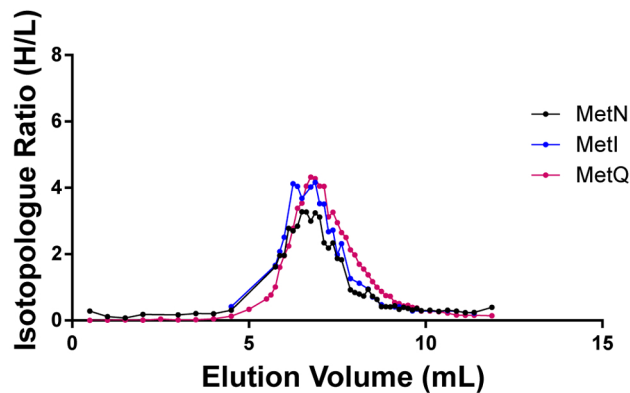**D**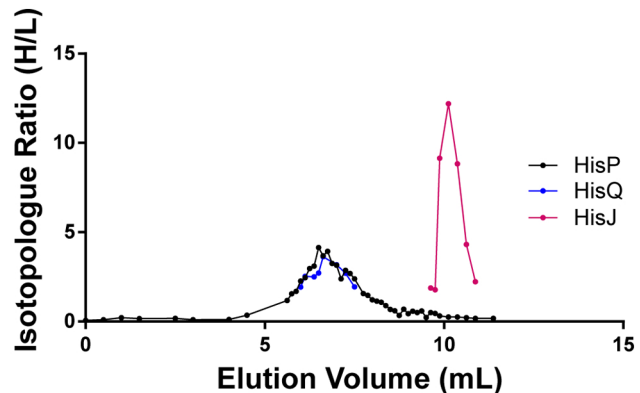**E**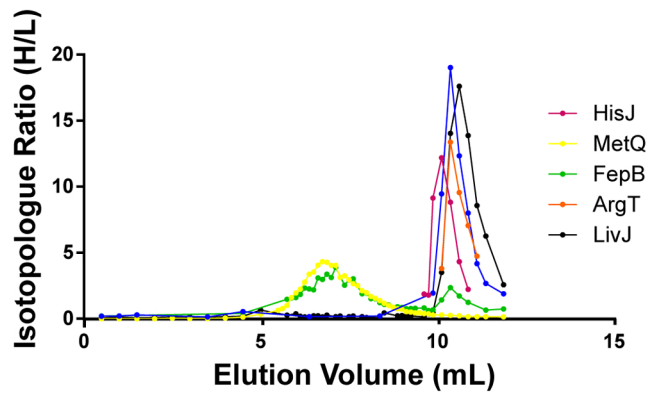

Supplement: supp [file elife_poa_e46615_Figure_8_figure_supplement_1.pdf › elife_poa_e46615_Figure_8_figure_supplement_1.pdf]
